# Supplementary material for: Studying Human Disease Genes inCaenorhabditis elegans: A Molecular Genetics Laboratory Project
Source: Atypon-hosted journal article supplement (doi:10.1187/cbe-11-06-0045), 2012-06-01
Supplement: combinedsupmats5.pdf [file combinedsupmats5.pdf]

## Appendix C: DNA Sequence Information

Sequences are included for the genes used in the laboratory exercise, and the corresponding deletion alleles.

### Sequence of *brc-1* gene:

```
ATAACTTTTTTTTTTCGTAGTTTTGTTATTTTTATTACTTCGAATATTTGCTTTTTATCAAAAATC
ACTGCAAATTCGAGAAAAATTGCAAATTTGGCAACAAAAAATGAAGCTACCGTACTCGCGGT
TACTGTAGATGATAAATTTTCGATCGTGCCAAGACCCGAGCTAGCGCAAAATCAACGAATTTAA
ATAATTTTCGGCATTTTTTTAAAGAAAAACCAATTTCTTATCTCTTTTTTCCAAAAGATTCGGCG
ATAAAAATTTGGGAAAAAGAATTAAAACCAGGAAAAATGGAAAAAATTGATTTTTTCTCCAAA
ATAAGAAAAGCGAAAATAAAGAAAATTTCTTCGATTATTCGTGATTTAATTGAACATAGGACAG
AATTGAAAACCGGTTTTTCTACTTTTTCAATTCAATTTTTTCTAATTTTTTTGCGTAAAATTTCA
ATAAATTTTTTTGAATAAAAATAAATTTCAATCTTGATAAATTTGACATAGATAAACTGTCAAT
AAGCAAAAAAATTTATAAAAATTGCCGTAAAAATACACTTAAAAACAGAACAAAGAAAGAAG
AAGAAATGAAAATTAATCCTGCAGGCAGCCTATCGAATCGACAGCTTTGTAAGGTTGAGTGGG
TAGAATTAATATTCACTGATACTGTCCAATACCCATTCCATTGTCAACCATCACATTTATAC
AGATTCTCGATATTTTTTGATTCTTCAATTGCTTTTGAGTGTTTTGAGAAGATTATGTAGAGTT
TTTCAGGTGACAGATTCTCGTAGCAACTCAGAATTTCTCCTCCGCATTGTTGGACAAGCTCGAT
TAGTTGCTGAAAACGATAGTTTTTTTAGGAGGAATTGATTAAAAAAAAAACAATTTTCTGACTAG
TTTTCGGTGTTTTGTTTATAAATTTTCAAATAAATTTGGATTTTTTCAGTTAAATTTTTTTTAAAA
TTTTTTCCTGAAAACCGCATTCAAACGTGATAATAAATTTCGAAAGTAGTCTTTTTTCCAGTC
TAACTGAAAAAATGTGCTGAAAATTTGAGGAACAACCTTTTTAATTTTTCTTTCTGTTAACCTAT
AAGTTATGTAATAAAAAAATTTTTAGTTTCAATTTAGCTTAAAAAACATGCTTTTTTGAAAAATTG
CTGTAATTAATTTTTGAAAACAAAACATAATTTTCAACCTCAAATCAGATTTAAAACAATAATG
TAACAATTCGAATTCAAAATAAATTTTCTTCTTTCAAATTTTAAAGATCAGTTTATTTAAAAAA
AAAGAAGTTTAAACTAAATTTAGATTTAATAATAATGTTTAAATTTTAACTTTTTTTTTTGAAAAC
TTGATAATTTAAAAAATTAATTTAATTCAGTTTTTTACTCATTTTATTTTTTTAATAGTAA
ATTTAGCGTTTTTCAAGATTTTTCAAATTCAAAAAATCCTAAAAATCTAAAATTTTCAGCGAACT
TTTTTTTTTGAAAAAATAATTTTCGAAAACTTTTTTTTAAACGCCACTTTTTTACGCACAAACCTT
ATAATCAAATACGGATTCATCGTAAATTTCTGAGAATCATGAATCGTTCGTCCCGCAAATAAT
TTTCCATGTTTCATCGTTTCTCGATCTGAGCCATCCCATTTTCGGAGCCAATTGACGGTGGTATTT
TTACAGGAATTGTTGAAGAACATGACGTTATCGTGTAGTCTGCCTGCAAAAAAAGCATTTTCTT
TTTTTTTTTCATTGTTTCCATGGAAATCATGGGAATTCAGCTGCCCATGCCAAAATTTGAGGAAA
AATTATTACTTTAAAAAATTTAAATTTAATTTAGCAAAAAAATTTGAAAATATTATGAAATTT
TTTCTAAAATAAGAAGCTTTTTCACAGTTTTTTTTTTTTTATTTTTCTCTTGTTCGTGATTTTGT
GTCGGTTTGCTTTTTTTTTTCTAAACTTTATTTTTATTTAATTTCTTCAAATTTGAAAAAATGCG
GCAAACGGAAATACCGAAAAAATCAAATAATCGTAACTATAATAATTTTAAAAAATCAG
TTTTTTTTTAATTAAAAAACCAAACATTTCCATATTTCCAATTAATATTTTTCAGAAAATTTCCAA
TCCAGTTTTTAAATTAAAAAATAATTCAAATTTCTGAAAATTAATAATGCCAAAATTTGTAATA
ATTCCGAGGAGTCCAAAATTTTCAGAAATTTCAAATAAATTTTCGCCATATTTTCAGATTATTC
TCTATCATTACATGCAAACTCCACTGTTTCTACTACACTTAAAGCTAAACTTAAACAATTCGCG
TTCCCAAAAATGCTCTAATTCACTGCAACTTTTTTTCGAACGAGGGCCGAGAAAAAATGCGAAAA
ATCGGTGTTTGCACACAAAACACCGCATTTTACGACATTTTGTACTTGCTTTGCACGGGGAGGC
AAAGCTAACGTGGCCGCGAGAGCTGCGCCGGCTAGGCCACCGCCTCCTATGGTTAAGAATTTTG
ATCGAATAAACATTTTTAATTTGACTTATATGCTTATTTTTCTTCGTTTTTTCTTATTTTTTCT
```

TGTTTTTCTTGTACTACGTGGAATAAGCATAATGTTTTTCAGCTAATCTACGCAAACCGCTTC  
GAAATTCGATGGATTA AACCGGACAAAGGTAAAAACGTCGAAAAGTAAGTTATTATTCAAAAT  
ATCTCGAAAAATTATGGTACAATATTTCTGAAAACCTACTCAAATATGAAAAATATATGCTGA  
TTCCGGATTGAAAAGTCTTGAACCTCAATCTCGCGTATTTCTTATTGAGTTTCTCGATTTT  
GAAAATTCGAGAAATTCAGTGCAATTTCGAATTA AAAATTAAATTTTCCAAAAATTATGGTA  
CAATATTTCTGAAAACCCACTCAAATATGAAAAATATATGCTGATTCTGAATTA AAAAGTCTT  
GAACCTCAATCTCGCGTATTTTCATATTTAGTTTCTCAATTTTAGTGAAAAATTCGAGAAATTC  
GTGCAATTTCGAATTA AAAATTA AAATTTTCCAAAAATTATGGTACAATATTTCTGAAAACCCA  
CTCAAATATAGAAAAATATATGCTGATTCTGAATTAGTAACATTTGAAACTCAATCTCACGTAT  
TTCATAATTTTTTTTTTCGATTTTAATGAAAAATCTAAGAATTCAGTGCAATTTTCGATTTTT  
TCAAAATATTTTCTCTTAATGTTTTTATAATTTCCAGATATTACGTTGTGCTGCATTGGAAGA  
TTTCAAGACAAAAATTCGAAATATATGCGAACAAAGAAGCTGTTCGAAGTATTAATAAGGAAG  
GTTAAGCAGCAATAAGTGCTCTTACAAGGGCTCAAGTGCCGCAGAAGAAGCCAAAGAAAGTAGG  
ACTGCAAGGTCAACTGCTCAATCAGCCACTATTTAAGAAGAACTACAAGTCAGATCGGTCCGA  
AGGCAATCAAAGTTCCAAGCAGAAGAAGTGAAGCTCATGGAAGAGGTTGGAAAGCACAAGTCT  
GAAGTTCATGAAGCACTCGGCGATTTGGTGGATACAAGATGTGTGATCGAAAAATTTCAAAAA  
TCTGATCAAAATCTTTGAAGCAATTC CACTCAGCAACCAGAATATTGGATTTCGTTTCCGAGGAT  
AAGTATGTGAATTTTCTTTAAATTTGAAAATTTAGAAAGTTGATTTTCAGGTGCAATGGTGAAG  
AGCTTCAACATCGTTCAACGAGGAAGCCGTTTTTCATGCCGTACCTCAATGATCCTGTTCAATTC  
CGTAAAAAAAAGTTCGCTTTATTGCAAAGGAGCAAACTTCGATGGAATTCCTGAGGTGTTACT  
TATTTTTTAATTTTTTAAAAATTA AAAATTTCTAAATTTCTAAAAATGCGACACGCTTCGTGAG  
AGGACCCCTCGCTGAATTGGGAGCCCGACTCGTGAATCGAAAGTATCAAACCGTTGTGAAACTCT  
TCGATCGTGCCACGTTGCTCGGTAGCATGATCAGAAGGACGCCGAGAAGAAGTGATAGGATAAG  
GAGACGACTGCCAAGAAGATCAAGCCATGCTTGTCTTTCTAATAATGTTTTTTATATTCGGTT  
CCTGTTTCAGATTTTTATTCACCCCTCCCATTTCGGTTAATGTTCTTCTCTCATTTCCTTGT  
CAGCATATTTACTTAGTATCCCTCTCTGACGAGTTTTTATATTGGTTTTTCGAGACAATGAATGTT  
TTAAACGTTATATTGATGTTATTAAATGTGTTATTCAGTCAATCGGAAGAAAAACTAGATAAAA  
ACAAACTATTCAGCTAAAATTCATCGAAAAAAGAGGAAATTTTCGGTTTTTCTCAGAAAATCAG  
TGGAACATAATGAGAAACATAAAATATGCACTTTTTTATTTTTTAAATTA CTATTCTGTATCAC  
AAAACATTTTTTTTCGACTTTTATTCGCTTAAATAATGAGAAAAGCGCTTTTAGCCAGAGCTGA  
TATTGACGAATTGTGCTCAAATAAAATGCGCGTACGCAAAGTACGCAATAGTGTA CAAAACCTTA  
TTCGCGTTGAATATTCAGTCAGCCAAATGGGACTACTGTAGAAATTTCTTTCAGCCACGTTAGCT  
TTGCCTCCCGTGTTTGTCTTGTCTTTTCCCAATTTTTCCCGTGTTTTCTTATTA AAAC  
TGATAAATAAATTTTTTTCCTAATGCTAAAATAATTTCCAGATGAAAAAATATGTATTCAGT  
CGGCAAGTAGTGGTGAAGTGGTCAATGTAATATGATGGATTACGGGAATACAAAACCCAACT  
TTTCCCAAACATGATACATAGATGTTTAGATGCTAAAAGTACCTGATTTTCATAACGAGACCG  
CTGAAAAGTTTTGAGGTTTTCAA AATTC AACTTTTTTATGCGAAAATCTCTACTTTTTTCACCAA  
AAAAGTTGAATTTTGAAAACCTCAA AACTTTTTTCAGTGATCTCGTTATGAAAATCAGGTAGTTT  
CAGCATCAGAGCAGCATGTGTGGGAAAAAGTTGGGTTTTTTATTCCCGTAATCCATCATATTG  
CATTGACCACTTTCACCGCTACTTACAGACTCAATACACAATTTTTTCACTTGGA AATTGTTTT  
AGCATCTGCAAAAAATATTTATTTATTAGTATTAATAAGAAAAAATGGGGAAAAATTGGTGA AAA  
ACGAAAGAAAACACGCGGAAAACAAAGCAACATAAATGGCCGCTGAAACTTGTGCGGGACTCGG  
CCATGGCCTAGAAACCTTTTTGCCTCGTCCCTCGTTTCGAAAAAGTTGCAGTGTAATCCCCCG  
TGCTCACCCCATATTTCCAACATTTTCCATATTTGTCCCTGCTCACCCCATATTA AAACCTT  
CAATTTCA TTTTAAATCTGATCGTTTTTTCGAATTATGCACAATCTCAAAAAACCCCAAATAA  
ATAACAATTTCAATGAACATTAATTCGATAATTTTCAA AATCACAAGCATGTTGGGTGTGTG  
TGTA CTCTGCTCTGATAAACTCATTTTTCATGTGAATTTTGAAAGAATTCGACCAGAGATCGCAC  
ACATTTATCAACAGAATTCACCACTTTTTGTATCAGACCATCTCATCGGAACATTTTTTTTAAAG

CGGAAATTAAAATGAAACACAAAAATTTAAAATATTACCTCAGACAGTAAAAGACCCGTTGTTAT  
ACAATCTACAAGCCATTGACGTCCTACAATAACGCATTTTCGAGCAATTGCATAGAGATATGCT  
GTGGATTTTTTGAGAAATTGAACGGCCTTCTGAAAATTAGTTAAAATTTATTTTGAACATAAAAAT  
CGTTTTTAAATAGTTTTTCTCGATGAAAAATCCAACCTTATTTTAAAATTTTCGCGCGGAAAAT  
CGAAAAACGAGAATTTTGTTTTTTCGAATTTCCGATATTTTGAGCACACTTAGATTTTTTTAAT  
AGCTTAAAATTTTGGCAATTTTTTTTTAATTTTTTGAAGAAAATGTACAAAATTTTATGAAACCG  
TTGTTTCTTTTTTTGTAAATTTAATTTTTCGGTTTTTTCGAATATATCTGGGAAAAAAACCAAAA  
AATTGCATCATTTTTAAAATCTAAAATTTCTCAATTTTTTGGATTTTTTAAAAGCGTTAAAAAAA  
CCATTTTTCTGCAAAATGTTTCGATTTTTTATTCTGCCGTTTGCAAAAATTTGGTAAAATCATG  
GTTTTTTTTTAAATTTTTTTCACAGATTATTTTTGAGAACAATATCTCTAAGAAAAAAGTCTTCC  
TCCAAATTTACAGTTTTTAACGAACCACTATTCATCATCACCAAATGAGTCGTGTGCTCATTCA  
CATCCTCCGCAAAATCGGCACGCATTTGACAAGAATTTGTGATAGAAAATCGCTGAGAAGTTCCCTG  
AAAAATAAGAAAATGTTTGAATTTCAAACATCCACCAGTCCCCTACTTTCGTCCGCATCATTAT  
GAATTCTCGAGCAAACAATTGTTTTTGGTACTTGTGACAACCTCATCGTCGATTCGATCTTCGTC  
ATCTTGAATTGCTTTCGGTGTACGGTCCGGCGTCAAGGGTAGTTGACTGAAAAATAATTTTTTATT  
TGGCTTTTTTTCAAATTTGGAATTTTTTGTTTTTGTTTTAATTATTATTTTTTAGTTTTTCCGA  
TATCTCCAATAATTTTCGATTTTTCTATCAGGTTGTCCATAAGTTTTTGTACTATTTTTTTTT  
TTGAAAAAATTTATTTCTCTCAAGCGACAAGTAGTACTATTACACAAGTATTCACCATTAGT  
GTCCACCCTTGTGCCATTTACTAGGTAACATCATGATGCCACGGGAGAAGAAATCCGGCGAA  
CGCGATGAGAAGAAAGTGGAGAGTTCAGTTTTGAGATGCTCTTCGTGTCGAATTGCTTGTGCG  
GCATGTAGTCACTGAGAGACAAGAACAATGGTAGTCGGTTGGTGCAAGATCTGGAGAATATGG  
TGGATGCGGTAAAACAGTCCAACCAAGATCTTGCAGCTTTTTGAAAGTCTTCTTGGCGACATGA  
GGCCTAGCATTATCGTGAAGAAAATATAGTTTTTTCATATTTTTCCGTTGGTCTTTTTCTGCAACTC  
GGTCCAATTTGGGCACAATAGTAATCAGCAGTGATAGTTTTTATTAGTTGGCAACAATTCACAGTG  
CACGGGTCCTTGAACACCCACCAGACACAGATCATAATCTTTTTTTGGGTGAAGATCAGGCTTT  
GGCGTCGGTATTCTTTCTCACCGATCGGAAGCCATTGACGTTTTCTGGAATGGTTAACATAGA  
GCACCCACTTCTCATCTCCAGTAACCAGATTGTTTCCAGCAATCGAACTTTTCGACGAAAAGTTAG  
AAGTTGAGTACAAACGTTGACCCGAGTGAGCTTCTGTGATGCCGAAAGTTTATGAGGCACCCAA  
ATTCCAAGTTTTTGAAGTAAAACCAAGGCGACCCAAGTGACGTGCAATTGTGCTATGACAACACT  
CAAGCTTCTCTTCCATTTACGAAGACTAAGACGAGGCTCTTCTCCACCAGCTTCACTAGGTC  
TTCTTCATTTAACTCTACCGGTCGCCCAGAACGTTCTATTTCTTCGAGACTGAAGTCGCCGTTT  
TTGAACTTTTTGAAACCAACTCTTTGCTGTATTATAAGAGAGTGCTCCCTCACCCATCGCACCGC  
ATATGTTTCGTTCCGCTTCCATTGCTGAATGACCAAGACGAAATTCATAAAGAAGAAGCAATCT  
AACGTCTCGACGTTCAAGTTTGATGATTGTTCATCGTGGCAAAGTAGAAATGGATGAAATGAATC  
TTTTCTGAAAGGGGACGACCCGACCTTGACACGACCTACGATGAAAAAATTTTAAAATTTCTA  
GAAGTTTTGAAAAAATATTTGAAAAAAGTACAAAACTTATGGGACAACCTGATATTTAAAAA  
AAAATTGCTTAAAATTTATTTTTCAAATTTTTTCTTTAAAGTTATGCTCGAAATTATAACAAAA  
ATGGAATTTTTGAATGAAAAAATATTTGCATTTTCTCAAATTTATGTTTTTTTTTTCGGGTTTCCAG  
CACTTTTTTATAAAACAATTTCAACTTTTTTTAAAATTTAAAATTTGAATTTTTTCTGTTGAAAACCA  
TATATTCAGGGGTGTGCGGCAAATCGCAAAATTTGCCGAGCTCGGCAAATTCGGCAAATCTCT  
TTGTTCAATATTTGCCGAGCACGGCAAATTCGGCAAATTTGCCGAGCTCGGCTAATTCGGCAA  
TTCGGCAAATTTGCCGTGCTTAACAAACTCGGAAATTTTTGATATTTTTTGTGATTTTTTGGACC  
ACCAAACTACCGAATTTTAAACACACATCTGGCTTCGGAATCAGTTCCGTGTAGTATGTCTGC  
TTAAGCATCAAATAACTCAATTTTTGTGTCAATTTTACTGAATTTTTTGGCGAAAAAATCAGTAGT  
TTTAGTCGAAATTTGACTGTCAAATTTTTGACGTGTGCGGCAAATTTGAAATTTGCCGAGCTC  
GGCAAATTCGGCAAATCAACTTTTTTTGAAATTTGCCGAGCTCGGCAAACGACAAATTCGGCAA  
TTTTGCCGCACACCCCTGATATATTTCTGCACACAATGATTTTCTTATATTTCTTACACTTGTAGC  
ACAGGTAACATTTGCCAGATCATCTTCATCAATTTGTAGTTCTCCTTCAGAATCTTCTACAAC

TCATCATCATCTGATGCTACGACCACTGGCTTTTTCACTGCAGTATTTAGATTCAAATCGATCA  
AATTTTGGAGTACTTTTGGAAAACCTCAGGCTTTTGGGCTAGTTTTTGGATTGGCTCAGGAGGAGT  
TTCCAGCGATTTCAGAAGCTGTCATAATTTTTATGTTTTCAAGATCTTGAGAACTCGCAAAGGAT  
ACTCTTCGATTTCGCTGGTTTCTCTGATTTTTTTCGGTGGCGCCACATGGAATTTCTCCATTAGCT  
GATTGATATTCTGCAAAAAATATTTTATTTCAAAAAATATTTTTCCTCTAAATAAGCCCGAATCA  
TCACAAACATTTTCGAAGAAATTGTCGCATCGTCGGCATTAATTGGAAAAGTGCATCGATTTTCAT  
CAATCTCTGTGCAATTTTCTGGAAAATTGGCAAAAAATTAGCGAATTTTTTTTTTGATTTTTTGACC  
AACCTCGGAGGGTATTTATGTATTCTTCAATATCAACATTTTTTCAGTTCTTCTCTTGATATTTT  
ATACGTTTCTGTAGAGGTTTCCACGTCTTTTTTCAATTTTTTCCAGCGGAATACTCGACTTTGG  
AGCTCTACAGGTTGTTTTGTGGCTGGTTCTGGCGGTTCTACCGGTTCTGCAGGCTCCTCGGCGA  
ATGCGCTCGGCGGTTGTGGTTCGACTCGGTCGCTTTCGGCGCTGAAAATACAGATTTAATGTTAA  
TAGAGTCAAAATAGCCCAAAAAGCCGAATTTTTTAATGATAACTTCGAAAAACGGACTAAATTT  
ATGCAAAAACCTCAAAATTTTTCAACTATTTAGCTAATTAGCAATTTGTATTGCATTTTTTAATTT  
TTTTTCCCAAAAAAATACACTAGAAAATGTAACATATAGAGTCCAGTTTTTCCAAACAAAAA  
GTAAAAAATATTTCTTTTCTGCTTTTTTTCGTGTTTTTGACGAAATTTTTTTCGCAGTCCGCTATG  
ATTTTCAGTTCAGAAATTAGCAAATCGATGAAAAAGTGTGTAATAAAATTTAATAAAATTTGATT  
TAATCGCTATACGACACAAAAAAGGTGAAAAATGTTTTTATTTGACATTTTAGAAATATTTTT  
AGTGATTTTTCTTTTGGTTTTTAATTGGTTTTTTTTGTGCCAAAAGCATAACCACTGGCAAAAAGGT  
ATAGCAAAATCTGGAGCGCATCGTTTTTCCATCATTCTCTGGAATAATCGTGATATCCAGCGGCA  
TTTGACTTTCCATGAACATTTTCTCTGGCGGCAGTGAACGTATTCATATTCTCAATATC  
TTTTTTAAATGCTTCTGATAGCTTTAAATAGTTCTGCACAGCCATTGTAATTTGATAAGTATCT  
CGACAACCTTCGCTTATCCAGTACACTTCTACAAATTGGGCATTGAACTTTTTCGTTTTCGTTTCGA  
AGCAAGCGTTAATGCAAGAACGACAGAAAATATGGAAACATGTGGACAGAATTGGATCTTTGTA  
TGTTGAACAGCTGAAAAAACC AATTTAAGGTTTTTTTTGTTGATTTTTTGAAAATAAATTACC  
AAATTCACATTTTCAGTCTTTTTTGAGTTCGTGCCACTGTTTCTGTGATCCTCAGTGCAACATC  
TGCCATCTGAAATTAATTTTAAACAAATAACATTTTCATTTTAATTGAAAAATCAATAAAGTAG  
GTTAAAAATACAAAATATTTGATTTCAAACCTCCCGCGCTGAGGGGGCATCAGAGAACACTCATT  
GCAAACCTGCTCCACTGACAATCGGGGCGGAGTAAAGCGGAGAGGAGAGAGCGCCCCGCTCCC  
CGCCGGTGCCTATATTTTCAGTCGGTGCCTCCGGTCTTCGCCAGCATCCCCGCTTTTCTCTCCC  
TTCTCTGATGACTCTCTTGTTTTTTCCATATTCTATCAAGGAAATTCCTTTTGAAATCCTGAGA  
CTTCAAGCTACGGAGAATATTTTTTTTTTAGAAAAAGAAAGAAAAAAGAAGAAAGAGTGCGCGA  
AAACGATGCTGCTTTTTTCGGTTTTCTATCTTTTTTTCTTCTTTTTTCGGCTTTGAAAAA

**Sequence of *brc-1(tm1145)*:**

ATAACTTTTTTTTTTCGTAGTTTTGTTATTTTATTACTTCGAATATTTGCTTTTTTATCAAAAATC  
ACTGCAAATTCGAGAAAAATTGCAAAATTGGCAACAAAAAATGAAGCTACCGTACTCGCGGT  
TACTGTAGATGATAAATTTTCGATCGTGCCAAGACCCGAGCTAGCGCAAAATCAACGAATTTAA  
ATAATTTTCGGCATTTTTTTAAAGAAAAACCAATTTCTTATCTCTTTTTTCCAAAAGATTTCGGCG  
ATAAAAACCTTGGGAAAAAGAATTAACCAGGAAAAATGGAAAAAATGATTTTTTCTCCAAA  
ATAAGAAAAGCGAAAATAAGAAAATTTCTTCGATTATTCGTGATTTAATTGAACATAGGACAG  
AATTGAAAACCGTTTTTCTACTTTTTCAATTCAATTTTTTCTAATTTTTTTGCGTAAAATTTCA  
ATAAATTTTTTTGAATAAAAAATAAATTTCAATCTTGATAAATTTGACATAGATAAACTGTCAAT  
AAGCAAAAAAATTAATAAATTTGCCGTAAAATACACTTAAAAACAGAACAAAGAAAGAAGAAG  
AAGAAATGAAAATTAATCCTGCAGGCAGCCTATCGAATCGACAGCTTTGTAAGGTTGAGTGGG  
TAGAATTAATATTTCACTGATACTGTCCAATACCCATTCATTTGTACCACATCACATTTATAC  
AGATTCTCGATATTTTTTGATTCTTCAATTGCTTTTTGAGTGTTTTGAGAAGATTATGTAGAGTT

TTTCAGGTGACAGATTCTCGTAGCAACTCAGAATTTCTCCTCCGCATTGTTGGACAAGCTCGAT  
TAGTTGCTGAAAACGATAGTTTTTTTAGGAGGAATTGATTAAAAAAAACAATTTTCTGACTAG  
TTTTCCGGTGTGTTTTGTTTTATAAATTTTCAAATAAATTGGATTTTTTCAGTTAAATTTTTTTAAAA  
TTTTTTCCTGAAAACGGCATTCAAACGTGATAATAAATTTGAAAGTAGTCTTTTTCCAGTC  
TAACTGAAAAAATGTGCTGAAAATTTGAGGAACAACCTTTTTAATTTTTCTTTCTGTTAACCTAT  
AAGTTATGTAAAAAAAATTTTTAGTTTCAATTTAGCTTAAAAAACATGCTTTTTGAAAAATTG  
CTGTAATTAATTTTTGAAAACAAAACATAATTTCAACCTCAAATCAGATTTAAACAATAATG  
TAACAATTCAATTCAAAATAAATTTTCTTCTTTCAAATTTTAAAGATCAGTTTATTTAAAAAA  
AAAGAAGTTTAACTAAATTTAGATTTAATAATAATGTTTTAATTTTAACTTTTTTTTTGAAAAC  
TTGATAATTTAAAAAATTAATTTAATTCAGTTTTTTACTCATTTTATTTTTTTAATAGTAA  
ATTTAGCGTTTTTCAAGATTTTTCAAATTCAAAAAATCCTAAAAATCTAAAAATTCAGCGAACT  
TTTTTTTTGAAAAAAAATAATTTGAAAACCTTTTTTTAAACGCCACTTTTTACGCACAAACCTT  
ATAATCAAATACGGATTCATCGTAAATTTCTGAGAATCATGAATCGTCGTCCCGCAAATAAT  
TTTCCATGTTTCATCGTTTTCTCGATCTGAGCCATCCCATTTTCGGAGCCAATTGACGGTGGTATTT  
TTACAGGAATTGTTGAAGAACATGACGTTATCGTGTAGTCTGCCTGCAAAAAAGCATTTTTCTT  
TTTTTTTTTCATTGTTTCCATGGAAATCATGGGAATTCAGCTGCCCATGCCAAAATTTGAGGAAA  
AATTATTACTTTAAAAAATTTAAATTTAATTTAGCAAAAAAATTTGAAAATATTATGAAATTT  
TTTCTAAAATAAGAAGCTTTTTCACAGTTTTTTTTTTTTTATTTTCTCTTGTGTTTTCGTGATTTTGT  
GTCGGTTTTGCTTTTTTTTTTTCTAAACTTTATTTTTTATTTAATTTCTTCAAATGAAAAAATGCG  
GCAAACGGAAATTACCGAAAAAAAATCAAAAAATCGTAAACTATAATAATTTTAAAAAATCAG  
TTTTTTTTTAATTTAAAAAACCAAACATTTCCATATTTCCAATTAATATTTTCAGAAAATTTCCAA  
TCCAGTTTTTAAAAATTAATAATAATTCAAATTTCTGAAAATTAATAATGCCAAAAATTTGTAATA  
ATTCAGGAGGAGTCCAAAATTTTCAGAAATTTCAAATAAATTCGCCCATATTTTCAGATTATTC  
TCTATCATTACATGCAAACTCCACTGTTTCTACTACACTTAAAGCTAACTTAAACAATTCGGC  
TTCCCAAAAATGCTCTAATTCAGTCAACTTTTTTCGAACGAGGGCCGAGAAAAAATGCCAAAA  
ATCGGTGTTTGCACACAAAACACCGCATTTTACGACATTTTGTACTTGCTTTGCACGGGGAGGC  
AAAGCTAACGTGGCCGCGAGAGCTGCGCCGGCTAGGCCACCGCTCCTATGGTTAAGAATTTTG  
ATCGAATAAACATTTTTAATTTGACTTATATGCTTATTTTTCTTCTGTTTTTTCTTATTTTTTCT  
TGTTTTTTCTTGTACTACGTGGAATAAGCATAATGTTTTTCAGCTAATCTACGCAAACCGCTTC  
GAAATTCGATGGATTAACCGGACAAAGGTAAAAACGTGAAAAGTAAGTTATTATTCAAAAT  
ATCTCGAAAAATTATGGTACAATATTTCTGAAAACCTACTCAAATATGGAAAAATATATGCTGA  
TTCCGGATTGAAAAGTCTTGAACCTCAATCTCGCGTATTTCTTATTGAGTTTTCTCGATTTTAGT  
GAAAAATTCGAGAAATTCAGTGCAATTTCGAATTAATAAATTTTCCAAAATTTATGGTA  
CAATATTTCTGAAAACCCACTCAAATATGGAAAAATATATGCTGATTCTGAATTA AAAAGTCTT  
GAACCTCAATCTCGCGTATTTTCATATTTAGTTTCTCAATTTTAGTGAAAAATTCGAGAAATTC  
GTGCAATTTCGAATTA AAAATTAATTTTTCCAAAATTTATGGTACAATATTTCTGAAAACCCA  
CTCAAATATAGAAAAATATATGCTGATTCTGAATTAGTAACATTTGAACTCAATCTCACGTAT  
TTCATAATTTTTTTTTTCGATTTTAATGAAAAATCTAAGAATTCAGTGCAATTTTCGATTTTTTT  
TCAAATATTTTTCTCTTAATGTTTTTATAATTTCCAGATATTACGTTGTCGCTGCATTGGAAGA  
TTTTCAAGACAAAATTCGAAATATATGCGAACAAAGAAGCTGTTGCAAGTATTAATAAGGAAG  
GTTAAGCAGCAATAAGTGCTCTTACAAGGGCTCAAGTGCCGCAGAAGAAGCCAAAGAAAGTAGG  
ACTGCAAGGTCAACTGCTCAATCAGCCACTATTTAAGAAGAACTACAAGTCAGATCGGTCCGA  
AGGCAATCAAAGTTCCAAGCAGAAGAAGTGAAGCTCATGGAAGAGGTTGGAAAGCACAAGTCT  
GAAGTTCATGAAGCACTCGGCGATTTGGTGGATACAAGATGTGTGATCGAAAAATTTCAAAAAA  
TCTGATCAAATCTTTGAAGCAATTTCACTCAGCAACCAGAATATTGGATTCGTTTTCCGAGGAT  
AAGTATGTGAATTTCTTTAAATTTGAAAATTTAGAAGTTGATTTTCAGGTGCAATGGTGAAGG  
AGCTTCAACATCGTTCAACGAGGAAGCCGTTTTTCATGCCGTACCTCAATGATCCTGTTCAATTC  
CGTAAAAAAAAGTTCGTCTTATTGCAAAGGAGCAAACTTCGATGGAATTTCTGAGGTGTTACT

TATTTTTTAATTTTTTAAAAATAAAAATTTCTAAATTTCCATAAAAAATGCGACACGCTTCGTGAG  
AGGACCCCTCGCTGAATTGGGAGCCCGACTCGTGAATCGAAAGTATCAAACCGTTGTGAAACTCT  
TCGATCGTGCCACGTTGCTCGGTAGCATGATCAGAAGGACGCCGAGAAGAAGTGATAGGATAAG  
GAGACGACTGCCAAGAAGATCAAGCCATGCTTGTCTTTCTAATAATGTTTTTTATATTCGGTT  
CCTGTTTCAGATTTTTATTCACCCCTCCCCATTCGGTTAATGTTCTTCTCTCATTTCCTTGTT  
CAGCATATTTACTTAGTATCCCTCTCTGACGAGTTTTATATTGGTTTTTCGAGACAATGAATGTT  
TTAAACGTTATATTGATGTTATTAAATGTGTTATTCAGTCAATCGGAAGAAAAACTAGATAAAA  
ACAAACTATTCAGCTAAAATTCATCGAAAAAGAGGAAATTTTCGGTTTTTCTCAGAAAATCAG  
TGAAACATAATGAGAAACATAAAATATGCACTTTTTTATTTTTTAAATTACTATTCTGTATCAC  
AAAACATTTTTTTTCGACTTTTTATTCGCTTAAATAATGAGAAAAGCGTTTTTAGCCAGAGCTGA  
TATTGACGAATTGTCGTCAAATAAAATGCGCGTACGCAAAGTACGCAATAGTGTACAAAACCTTA  
TTCGCGTTGAATATTCAGTCAGCCAAATGGGACTACTGTAGAAATTTCTTCAGCCACGTTAGCT  
TTGCCCTCCCCGTGTTTTGTTTTCTTGTTTTTTCACCAATTTTTCCCGTGTTTTCTTATTA AAC  
TGATAAATAAATATTTTTTCCCTAATGCTAAAATAATTTCCAGATGAAAAAATATGTATTCAGT  
CGGCAAGTAGTGGTGAAAGTGGTCAATGTAATATGATGGATTACGGGAATACAAAACCCAACT  
TTTCCCCAAACATGATACATAGATGTTTAGATGCTAAAAGTACCTGATTTTCATAACGAGACCG  
CTGAAAAAGTTTTGAGGTTTTCAAATTCAACTTTTTATGCGAAAATCTCTACTTTTTTCACCAA  
AAAAGTTGAATTTTGAAAACCTCAAACCTTTTTTCAGTGATCTCGTTATGAAAATCAGGTAGTTT  
CAGCATCAGAGCAGCATGTGTGGGAAAAAGTTTGGGTTTTTTTATTCCCGTAATCCATCATATTG  
CATTGACCACTTTCACCGCTACTTACAGACTCAATACACAATTTTTTCACTTGGAATTTGTTTT  
AGCATCTGCAAAAAATATTTATTTATTAGTATTAATAAGAAAAAATGGGGAAAAATTGGTGAAAA  
ACGAAAGAAAACACGCGGAAAACAAAGCAACATAAATGGCCGCTGAAACTTGTGCGGGACTCGG  
CCATGGCCTAGAAACCTTTTTGCCTCGTCCCTCGTTTCGAAAAAAGTTGCAGTGTAATTCCCCCG  
TGCTCACCCCATATTTCCAACATTTTCCATATTTTGTCCCTGCTCACCCCATATTA AACCTTT  
CAATTTCATTTTAAATCTGATCGTTTTTTCGAATTATGCACAATCTCAAAAAACCCCAAATAA  
ATAAACAATTTCAATGAACATTAATTCGATAATTTTCAAATCACAAGCATGTTGGGTGTGTG  
TGTACTCTGCTCTGATAAACTCATTTTCATGTGAATTTTGAAAGAATTCGACCAGAGATCGCAC  
ACATTTTATCAACAGAATTCACCACTTTTTGTATCAGACCATCTCATCGGAACATTTTTTTTAAAG  
CGGAAATTA AAATGAAACACAAAATTA AAATATTACCTCAGACAGTAAAAGACCCGTTGTTAT  
ACAATCTACAAGCCATTGACGTCCTACAATAACGCATTTTCGAGCAATTGCATAGAGATATGCT  
GTGGATTTTTTGAGAAATTGAACGGCCTTCTGAAAATTAGTTAAAAAATTATTTTGA ACTAAAAAT  
CGTTTTTAAATAGTTTTTCTCGATGAAAAAATCCAAC TTATTTTTAA AATTTTCGCGCGGAAAAAT  
CGAAAAACGAGAATTTTTGTTTTTTCGAATTTCCGATATTTTGAGCACACTTAGATTTTTTTAAT  
AGCTTAA AATTTTGGCAATTTTTTTTTAATTTTTTGGAAAGAAAATGTACAAAATTTTATGAAACCG  
TTGTTTTCTTTTTTGTAAATTTAATTTTTCGGTTTTTTCGAATATATCTGGGAAAAAACC AAAA  
AATTCATCATTTTTAAAAATCTAAAATTTCTCAATTTTTTGGATTTTTTAAAAAGCGTTAAAAAAA  
CCATTTTTCTGCAAAATGGTTTCGATTTTTTATTCTGCCGTTTGCAAAAATTTGGTAAAATCATG  
GTTTTTTTTTAAATTTTTTTTTCACAGATTATTTTTTGAGAACAATATCTCTAAGAAAAAAGTCTTCC  
TCCAAATTTTCACAGTTTTTAACGAACCACTATTCATCATCACCAAATGAGTCGTGTGCTCATTCA  
CATCCTCCGCAAAATCGGCACGCATTTGACAAGAATTTGTGATAGAAATCGCTGAGAAGTTCCTG  
AAAAATAAGAAAAATGTTTGAATTTCAAACATCCACCAGTCCCCTACTTTCGTCCGCATCATTAT  
GAATTTCTCGAGCAAACAATTGTTTTTGGTACTTGTGACAACCTCATCGTCGATTCGATCTTCGTC  
ATCTTGAATTGCTTTCGGTGTACGGTCCGGTCAAGGGTAGTTGACTGAAAAATAATTTTTTATT  
TGGCTTTTTTTCAA AATGGAATATTTTTGTTTTTGTTTTAAATATTATTTTTTAGTTTTTCCGA  
TATCTCCAATAATATTTTCGATTTTTCTATCAGGTTGTCCATAAGTTTTTGTACTATTTTTTTTT  
TTGAAAAAATTTATTTCTCTCAAGCGACAAGTAGTACTATTCACACAAGTATTCACCATTAGT  
GTCCACCCTTGTGTCATTTACTAGGTAACATCATGATGCCACGGGAGAAGAAATCCGGCGAA  
CGCGATGAGAAGAAAGTGGAGAGTTCAGTTTTGAGATGCTCTTCGTGTCGAATTGCTTGTGCG

GCATGTAGTCACTGAGAGACAAGAACAAATGGTAGTCGGTTGGTGCAAGATCTGGAGAATATGG  
TGGATGCGGTAAAACAGTCCAACCAAGATCTTGCAGCTTTTGGAAAGTCTTCTTGGCGACATGA  
GGCCTAGCATTATCGTGAAGAAAATATAGTTTTTTCATATTTTTCCGTTGGTCTTTTTCTGCAACTC  
GGTCCAATTGGGCACAATAGTAATCAGCAGTGATAGTTTTTATTAGTTGGCAACAATTCCCAGTG  
CACGGGTCTTGAACACCCCACCAGACACAGATCATAATCTTTTTTGGGTGAAGATCAGGCTTT  
GGCGTCGGTATTCTTTCTCACCGATCGGAAGCCATTGACGTTTTCTGGAATGGTTAACATAGA  
GCACCCACTTCTCATCTCCAGTAACCAGATTGTTTCAGCCAATCGAACTTTCGACGAAAAGTTAG  
AAGTTGAGTACAAACGTTGACCCGAGTGAGCTTCTGTGATGCCGAAAGTTCATGAGGCACCCAA  
ATTCCAAGTTTTTGAAGTAAAACCAAGGCGACCCAAGTGACGTGCAATTGTGCTATGACAACACT  
CAAGCTTCTCTTCCATTTACGAAGACTAAGACGAGGCTCTTCTCCACCAGCTTCACTAGGTC  
TTCTTCATTTAACTCTACCGGTCGCCCAGAACGTTCTATTTCTTCGAGACTGAAGTCGCCGTTT  
TTGAACTTTTGAACCAACTCTTTGCTGTATTATAAGAGAGTGCTCCCTCACCCATCGCACCCG  
ATATGTTTCGTTCCGCTTCCATTGCTGAATGACCAAGACGAAATTCATAAAGAAGAAGCAATCT  
AACGTCTCGACGTTCAAGTTTGATGATTGTCATCGTGGCAAAGTAGAAATGGATGAAATGAATC  
TTTTCTGAAAGGGGACGACCCGACCTTGACACGACCTACGATGAAAAAATTTAAAACTTTCTA  
GAAGTTTTGGAAAAATATTTGAAAAAAGTACAAAACTTATGGGACAACCTGATATTTAAAA  
AAAATTGCTTAAAAATTTATTTTCAAATTTTTTCTTTAAAGTTATGCTCGAAATTATAACAAAA  
ATGGAAATTTTGAATGAAAAAATATTTGCATTTTCTCAAATTTATGTTTTTTTTTTCGGGTTTTCAG  
CACTTTTTTATAAAACAATTTCAACTTTTTTTAAAATTTAAAATTTGAATTTTTTCTGTTGAAAACCA  
TATATTCCAGGGGTGTGCGGCAAATCGCAAATTTGCCGAGCTCGGCAAATTCGGCAAATCTCT  
TTGTTCAATATTTGCCGAGCACGGCAAATTCGGCAAATTTGCCGAGCTCGGCTAATTCGGCAA  
TTCGGCAAATTTGCCGTGCTTAACAAACTCGGAAATTTTTTGATATTTTTTTGATGTTTTTTGGACC  
ACCAAACTACCGAATTTCTTAACACACATCTGGCTTCGGAATCAGTTCCGTGTAGTATGTCTGC  
TTAAGCATCAAAATAACTCAATTTTGTGTCATTTTACTGAATTTTTGGCGAAAAAATCAGTAGT  
TTTAGTCGAAATGTACTGTCAAATTTTTGACGTGTGCGGCAAATTCGAAATTTGCCGAGCTC  
GGCAAATTCGGCAAATCAACTTTTTTTGAAATTTGCCGAGCTCGGCAAACGACAAATTCGGCAA  
TTTGCCGCACACCCCTGATATATTTCTGCACACAATGATTTTCCATATATTTCTTACACTTGTAGC  
ACAGGTAACATTTGCCAGATCATCTTCATCAATTTGTAGTTCTCCTTCAGAATCTTCTACAACCT  
TCATCATCATCTGATGCTACGACCACTGGCTTTTTTCACTGCAGTATTTAGATTCAAATCGATCA  
AATTTTGAGTACTTTTGAACCTCAGGCTTTTGGGCTAGTTTTTGGATTGGCTCAGGAGGAGT  
TTCCAGCGATTCAGAAGCTGTCATAATTTTTATGTTTTCAAGATCTTGAGAACTCGCAAAGGAT  
ACTCTTCGATTTCGCTGGTTTTCTCTGATTTTTTTCGGTGGCGCCACATGGAATTTCTCCATTAGCT  
GATTGATATTCTGCAAAAAATATTTTATTTCAAATTTATTTTCCCTCTAAATAAGCCCGAATCA  
TCACAAACATTTCGAAGAAATTGTCGCATCGTCGGCATTAATTGGAAAAGTGCATCGATTTTCAT  
CAATCTCTGTGCAATTTTCTGGAAAATTTGGCAAAAATTAGCGAATTTTTTTTTTGGATTTTTGACC  
AACCTCGGAGGGTATTTATGTATTTCTTCAATATCAACATTTTTTTCAGTTCTTCTCTTGATATTTT  
ATACGTTTCTGTAGAGGTTTCCACATCCAGCGCATTTGACTTTCATGAACATTTTTCTCTGGC  
GGCAGTGACTTGAACGTATTCATATTCTCAATATCTTTTTTAAATGCTTCTGATAGCTTTAAAT  
AGTTCTGCACAGCCATTGTAATTTGATAAGTATCTCGACAACCTCGCTTATCCAGTACACTTCT  
ACAAATTGGGCATTGAACTTTTCGTTTTTCGTTTGAAGCAAGCGTTAATGCAAGAACGACAGAAA  
ATATGGAAACATGTGGACAGAATTGGATCTTTGTATGTTGAACAGCTGAAAAAAAACCAATTTA  
AGTTTTTTTTTGTGATTTTTTTGAATAAATTACCAAATTTCCACATTTTCAGTTCTTTTTTGCAGT  
CGTGCCACTGTTTCTGTGATCCTCAGTGCAACATCTGCCATCTGAAATTAATTTTAAACAAAT  
AACATTTCATTTTAATTGAAAAATCAATAAAGTAGGTTAAAATACAAAATATTTGATTTCAAAA  
CTCCCGCGCTGAGGGGGCATCAGAGAACACTCATTGCAAACCTGCTCCACTGACAATCGGGGCG  
GAGTAAAGCGGAGAGGAGAGAGCGCCCCGCTCCCGCCGGTGCCTATATTTTCAGTCGGTGGCC  
CCGGTCTTCGCCAGCATCCCCGCTTTTCTCTCCCTTCTCTGATGACTCTCTTGTTTTTTCCATA  
TTCTATCAAGGAAATTCCTTTTGGAAATCCTGAGACTTCAAGCTACGGAGAATATTTTTTTTTTA

GAAAAAGAAAGAAAAAAGAAGAAAGAGTGCGCGAAAACGATGCTGCTTTTTTCGGTTTTCTATC  
TTTTTTTCTTCTTTTTTCGGCTTTGAAAAA

**Sequence of *cua-1* gene:**

TTAAATTTTTAAAAATGTTTATTAAATTCGATTCAAAATTTGGAAAATACAAGAAAATAAGGC  
AAAAATCACAAATTTAAAACAATAAAACCGCGTAAAAAATGGAATTTGGTTCGGTATGTGTGTGA  
TGAGAGTGAGATGACGAAACGAAGCACGCAAAATGTACAAAAAATTTGGATAAAAAATCAAAAA  
ACTACACAATGAGATCCTCTAAATCTGATCCAACATTATCCAAAAGTCGTTGCTTTTTTCGAGCT  
CCCAGAGCTCACGATACTTGTGTTGAGCCGAGCAGTGAGCCAACTTTTGAGCTTAATATTGAT  
AATTTTGAAGAAGCAGCACCTCGAAAAACAGCCGAATCGTCTAGGCCTCGATGCACTTGAACCT  
GGAAAGAGCCCGATTTCGAGGAACCTTCTGATGTCGTTTGAAGCTCGTTCGTATAGAGATTTGCAAT  
CGTTGGTTTTTCGGAAGTTTTTTGAGTAAAAGTGAAGAAGAAACCACGGAGACACTGGAAAGAGCC  
ATTGCAGCTGCAGCCATCCATGGTTGAAGCATGAAGCCAAATGGGCGGAATACACCTGGAAAT  
TGAAAAATTATTAAAAGTGGATTGTTTTTTGTTATTGGAAAAATAGCGTTTTTCTAGAAAAACAA  
TATTTTCTTCTTTTTTTTTTCTCAACGAAAATCAACGAAAATTTTCATTAAATTTTGAATTTTTCA  
AATTTTCCAGACAAAAGTAGAAAATTTCCGTTTTTTTTCTCGAAAAATAGCTTCAAACCTAAGCT  
ATTTTTCTTTTTTTTCAGAAATTTTTTTTTCTTAAGTACTTCTCAACAAGATAAACCGAATTTGA  
TAAAATTTTGAATTGTTTAAAAATTTTCTAGACGATTTTTTCGTTTTCCGGGTATTCGAAAAGTC  
GAAAAATTTTGATTTTTTTTTGTTTCGAAAAAAAATTACCCGGGTTTTTCGAAAAATAGCTACAAAT  
TTTGACCAATTTTCTTTTTTTCAGAGAAAATATAATTTTTTAAAGTTTTTCTCTCAAAAAAAT  
GATATTTAAAATTTCAAATTTAAAAAATGTTCTAGACATTTTTTTTTCAATTTTTTCGTTTTTCG  
GAAAATTGAAAATTTTTTCGACATTTTTAACACTTTTTATTCTACCATTTGAAATCGGTTTTTTTT  
GTTTCGAAATAACTTTTTTAAAATTCACCTGCAGCAATCGGAATCCAATCGCATTATAAATGAT  
TGCAAACAAAAGTTCAATCGAATCCTTCTCGTCGTCATTTTTCGATAGCTTAATTGCTCCAACA  
ACATCCACAAGATCATTCTAACAAGTACGATTCAGCTGACTCAATTGCCACGTCACTTCCTG  
CAGCAATTGCGATACCAACATTGGCTTCTGCGAGAGCCGGCGAGTCGTTGACACCGTCTCCAAC  
CATTGCAACTTTGTTTTTGTATCCTTTCAATTGCTTAATCTTTTGTTGCTTTTGATTTGGAAGA  
ACTTCTGCGAATACTTCATCAATTCGACTTGTTCGCAGTTGATTCTGCAGTTTTTCGAGTTAT  
CTCCTGTGAGAAGTACGACACGAAGACCCATTTACGTCAGAGTATAGATTGCAAGTGATGCTTC  
TTTTTTAACTTGATCAGCAATTGAAATTACAGCAACCCTTCGCTGAAATAGTTAATTTGTCA  
ATAACTACAGCTGTTTTGACAGACGAAATTGACTTTTTTTCATTAAAAAAAAGGATTTTTTTCAG  
TGGAGTAAAAGAATTTTTTAAAGCAAGATCCAAGAGCAAGATCCAAGACCAAGAAAAATATACTA  
GTTTTTTTTTGGTTTTTCTTTGGAAAAATGACTTTTTTTGAGTTTTTTGGACCAAGAAAACAGTT  
TTTTTTTTCAAAAATTGTAAATTTTACTTGGAAAGGAGAAATACAATTTAAAAGTGTTTTGTTTTT  
TTTTGGTCCAAATTTCAAATTTTGTAAAAACGGCGAACATTCAGCAAAAATCTTTAAAGGCAA  
GGTAAAAATTCCTCCAAAAATAAACGAATGATTCATTCAAATTCAAAAGAGTGTACGCCTTTA  
AGGATAACTGTAATTTATTGAAGAAGCGAAAAGTGA AAAAGGAATACACAAAATTTTGGGAAAA  
AACTTTAGCAACTACAGTAAGAAAATTTGTGTCGTGTCGAGAACC GGGTACCGTAGCTTTTCGAACA  
AAAACCTGAAAAATTTTGGTTCTGAACACTGAAATTTTTTAAAATTAGGTGTTAATATTGGGAATT  
TTAGCGAAATTTTATTTTGGAGAAATATTTTAAATTTTCCAATAATTTCCAGTCACTTCTTGATT  
TTTAAATAAATTTGCTTGTTTTTTTTTATCGTTTTCCGATTTTTTTTTGATTTTCTCTGAAAATCA  
ACGAAACAAAACCTTACCGTTAATTTGCACAAAATAACCGAAATGTGTCCTTTTCTCTGTCTTCT  
GAAAGTGTCAATTTTCACAACTTCCGATACGGGAATTCGTCGTTTTCCATCATTTCTTTCGGTTC  
CAATCACAATGTTTCGCAGTGTCCGGGTTTGGTTGGCTAACTTGAATTTATATGAATTTATATTC  
ATTTATAAATTTAAAAGACTACCTTCTTTACTAGAACTTGAAGTAAATTTGACTTCGGTTCCAG  
GAATCGTGATAGTTTGACCATCAGGAAGCCTTGGAAATTTCAACAAGTAGATCCAGAAAGTGCCAA



AGACGAGAACGACTGCCGAATTGAGTCAATTCTACAGGTAACACCATGTCCAGCAGATACATGG  
AATCGGGAAGTGTTCGGCCAAGTTGGCTCATTGAGAAGCTGAAAAAATGGATTTTCTTGTTTTT  
TTTCAGTTTTTTTTGGCAAAAATTGATTTTTTTTTTTGTATTTTTTTTTTTGGTTGGTATGATGAGAAA  
ATCGAATTTTTTTTTGTTTTTTTTGTTGGCAAAAATGGATTTTTTTGTTTTTTTTTTTTTTGGTTTTT  
TTTTGTTTCTTGATTTTTTTGTTTTTTTTTTTCGGCAAAAATAAATTTCTGGTTTTTTAATAATTTT  
TTTTTTGCAAGAATAGATTTTTTTTTTTGGTTTTTTTTTTGGTTGGTATGATGAAAAAATCAAAAA  
CTTTTTTTTTCCGTTTTTTTTTTGGAGAAATCCGATTTTTTTGTTTTTTGATCCAAGTTTGAACA  
ATTTTTTTTTCGTTTTTTTTGGTTCGAAATATTTTACTCTCTTTACTCTTAAAATACCTGTTTCGCA  
AAAGCCGCTACCGCATTTCCAATCGGATGCTCCGACAAAGCTTCAGTGGCTCCGGAGAGGAATG  
TGATAAGTTTTAGTGACATTGTAGATGGATTTACAAACGACGCAATTTGAACTACTCGTGGACG  
TCCTTCGGTGATTGTGCCAGTTTTGTTCGAAAACAATTGTGGTTACCTGGAAAAAAGAGTGATTA  
AAAAATTTGAGATTTGATAAATATTGCTTTTTTTTTGTTTCATATTAAGATAATTTTGTTAATGTT  
TCGATTTTTCTTTTTTATTTATTTTTCCCTGAAAAATATCGAAATTCGCGGTTTGAAAAATGGA  
TCTTTCTTTATTTCTCGATTTTTTTTTCGTTTTTTTCGTGCAATTTCTGATTTACACTAATTTGG  
ATATATTATATCTTTAGTGGCTTCGTGAAATTTTAAAAAATTTATTTCTGATATTTACGAGTG  
AAAATAAAAAAATGGTACTCTAAGAAACAAGGTTTTTTTTCTGGGAAGTAAAAACATCTAAAT  
TTTGTTTTTCGATGTTTCAAATTTTCGGTTATGTCTCTTCTATTTGAATTTGAAATAAATATGT  
TTTTTAGTGTTGTTAATATGAGAAAATGTTTAAAATTTTGACAGTGACATCCAAATTTCTAAAT  
CCGAACTCACTTTATGTACACTCTCCAATGGTTCGCCTCCTTTAATCAAATACCATTTGCTGC  
TCCAACTCCAGTTCCAACCATAACAGCGGTGGCGTTGCGAGACCCAGACTACAAGGACATGCA  
ATTGCAAGTACAGTAATCGCAGCTTCAAATGCGATTTTCAAGGCTTCTCGAATCGAAGACCGG  
GTGGCTGGAAAAATACATGATTTTGATTAAAACTCGGGCTTTGGCTTTAAATTTTAATTTTTTCA  
AATCGAATTTGCAATATGCAATAAAAAATTTTTTTTTTTTAAAGCTGATCTTGAAAAGCCAAGAT  
CTTGGCGGGCTTTAATTTGGGAAATTTAGCAGCGAGGAACGAAATTTCTCGATCTTCTTATTTAC  
AGCTCTTTTTGAAAATTTTCAAAGCACGACAATCAATTTTTAAAGATCCAAGTAAAATTTGC  
TCATGAATTTCTTTCTTTGCTGCTAAATTTATAATCATAAATTCACGTTTTTCGAGCATTTCTGAA  
TCCAACTTTATAGTATTTAATCTATTTTTCCCTTACCAAATTAGCATTCTCTCGCCGAATTTGTAC  
TCAATATAGATCCATACTCCCAACGTGAACAACGATAATACAATGACAAACGGGACAAAGTATC  
CGGCAATTTTATCGGCAAGTTGTTGAATTTGGAGCACGATTCGTTTGAGCTTCTTCGACGAGACG  
GACGATTTGTGAGAGTGTAGAATCATTGCCAACGTGTGTTGCCTTACAATTAGAACTCCTTTT  
TGATTCACCGAGCCACCAATTACAGTACTTCTAGAAATTTATTGTTGTGAAAAATAACTTACAA  
TTCGGTTTTGAAACAGAAATGTTCTTTTTTTTTGGATTTTTTAAATGACAAAATAATTTTTTTTGAATT  
TAAAAAATAACGAAAAAAGTTTATTTTTCGAAATATTTATAACAGTCGTGAGCATGACTGTAGATT  
TTTCGAAAAAATAGTGAGCAAAAACGCGAGAAATTTTCGACATGAATGTTTAAATTTTGCATTT  
TTTCCAAAAAATCACACTGATAATTATAATCAAAAATTTATAAGTTCTTCTAAATAGCGTTTC  
AAACTAAACATGTTTTGTTTTTTTCGTGTATTGGCTAGAAACATTTTTTTTTCTCGTTTTCCAAAT  
GAATAATTTTTTTCTCAAACAGTTGAAAATTTTAAATTTTTTGGTGATAAATGTTTCGATTTTGTT  
ATGTTTTTGCAGAAATTTAAACGAAAAATGTTTCTTTTTTTTTTTTCGTTTTTTTGATGGAAACATT  
GATTTCTCGCTTTTCTTCAAGAAAAACTAGGGAAAACGCGAAAATTTGGAAAATTTTTTCTAACT  
TTTTGTTTGTAGCTTTCAAAAAACGTTTAAAAATTTTTTTTTGAAAAACAGACCGTAACCGTTT  
TTTTTGTGTTTTTTGAAAAATTTTCAGGAAATTCGAAAAAAAATTTGCAACAAAAATCCGAAT  
TACCTGGTTTCTTAACGACAGGCATCGATTCTCCAGTTATAAACTCTCATCAACCGAACTTTTT  
TCCATCAACTACAACCTCCGTCGACTGGAACTTTAGCGCCAGGAACCACTTTAATCAGGTCATTT  
CTTTGCACATAATCAATATTTATTCCTTTTTTCAGACGTTAACCGTCTTCCGAATCCATTGTGA  
CAAGTGTAGCTTCTTTTGCTTGTAAATGACATAAGTTTCGATAAAGCTTCAGATGTTTTCCCTT  
TGCTTTATGTTCCAGCATTTCTTCCAAGTGCAATAAATACAATTAACATTTGGTGGAACATCGAAA  
AATGTCATTTGGAGACGACGGCCATTTGAAAATGATTGCGAGGAGAAGAACTACGATTGAATAGG  
TGTAGGCAATGGTTGTGGACAGCATTATTAGTACATCCATATTTGCATTTCCATGTTTTATTGC

TTTCCATGAGGCTACGTAGAAATATCGACCGCCAAAAATCTGCAATTTTCTTATTGTCAATTTT  
TTAAAAAACTAAGAAGAAAATATTTTAAATTTTACCTCCAGAACAGGGGTGTGGTTTTTAGAT  
TTTTTGAAAAGCGAAAAGTTTCGTGTTTCTCCGATTTTGTAGTTTTTCAATATTTTCAATTTTTT  
TATAGACTATTCTAAATAAAATTTCTCTTAAATTTGTATCATTAGTCTTATTTTTAGAGAACAT  
TTTTATGTTTCTTATGTTATTTTCCCATTAAATATACACGAAATTAATAAAAAAGCGAATTTT  
ATGGTTTATTTTCTAAATTTTTTCCGATTTTCCCGGAAAAATTTTAAAAAACGAACGAAAT  
TTATTCAGATTTTTCGATTTTCCATTTTTTTTTTCTAAAAATTATAGTCGATTTTTTTTTGCTT  
TTACTTCCGTGTTTTCGGAGGAAAATTTATTTTTTTCGCAATTTTTCGAAGAAAAATTTTTATAAC  
AAAAAACAAAATTTTAGTCCTAAAATTATACCCGAATTTGTTTTTATTGGGTTTTTTGAAAA  
AAAAATTTTTTTCGTGTTTTTGGCCAAAAATTTATTTTTTCAATTTTGAAAAAAAGCAAAA  
AAAGAAAATAAATTTATTAGCCTGTGATAACTGGAAAATTCATAAAATTTTAAGTTAAGCTC  
TTTTTTCTTAAAAATTATAATTGAATTTTTTTTCTTTTTTTCGTGTTTTTTCATGGGAAAATGTTA  
TTTTCAGAATTTTTCAAACATATTTTTTTTGGTAACTGAAAAATATTTTTTTGGCTACTCCAAA  
AACTTCTTTTTATTGGTGTAAACTGAAAATTTCTCACCTGAACCGGTGTGCAAAGACATAAAA  
GCAGAAAGTTGTCAAGTGAAAGAGCTGGAGTGAAAATTTGGTGTGTTGTTGTCTGGATGCATTGG  
CGTTCGGAGAATCCAGTGAAAGATTATCATAATTATCATTACAGGGACTCCGAATATTAATGCG  
ATGAAGAAAGTGTACGCCATCTGAAAAACCGTTATTGTGAATTTTTGCTTGAAAAATAGTCGG  
AAAAAAAATATATACCAGCCGCTGACCGCGCCTACGGCGGGCAACGACTGGCACCATTA  
AAAGTATTTGACACACATACCTTCAATCACTCAAAAAATTTCTCATCATGAAAAAACTTGACA  
CACTTAAACGCGTTTTACTGGCACTGTTACACGTATTTTTCTACGACATGCATGTTTCGAAAAT  
TCACAGACAGTATGAAAACGTTCTGTTACTTTCTGACCAAGACAGTAACCTTACAATACCACTA  
CAGTACCTTGACATTATCCTCCACCGACTCCTAACTCAATACCTCTTCAAAGGACGAAATGCCA  
ATTTTTCCAAAACCTACAGTAACCCTACCGTATACCTACAGTACCCCTATAGTACCCTACAGTA  
CCTTGACTTAATCCCCATCAACTCCCAAATAACTACCTCTTCTAAAGCTCTAAGCTCAATTTT  
TCGGAACATTCAGAAATTTTCTCGATTTTCTAGAAAGTTCTAGAACATTCAGAAATTTCCCG  
ATTTTTCTAGAAAGTTCTGGAACATTCAGAAATTTTCCCAATTTTTCTAGAAAGTTGTGAAACA  
TTCCAGAAATTTTCTCGATTTTTTCTAGAAAGTTCTGGAACATTCAGAAATTTTCCCAATTTTTCT  
AGAAAGTTGTGAAACATTCAGAAATTTTCTCGATTTTTTCTAGAAAGTTCTGGAACATTCAGAA  
ATTTCCCGATTTTTTCTAGAAAGTTCTGGAACATTCAGAAATTTTCCCAATTTTTTCTAGAAAGTT  
GTGAAACATTCAGAAATTTTCTCGATTTTTTCTAGAAAGTTCTGGAACATTCAGAAATTTTCCG  
ATTTTTCTAGAAAGTTCTGGAACATTCAGAAATTTTCCCAATTTTTTCTAGAAAGTTCTGGAACA  
TTCCAGAAATTTCCCAATTTTTTCTAGAAAGTTCTGGAACATTCAGAAATTTTCCCAATTTTTCT  
AGAAAGTTCTAGAACATTCAGAAATTTTCCCAATTTTTTCTAGAAAGTTCTGGAACATTCAGAA  
TTTTTCTCGATTTTTTCTAGAAAGTTCTGGAACATTCAGAAATTTTCCCAATTTTTTCTAGAAAGTT  
CTGGAACATTCAGAAATTTCCCAATTTTTTCTAGAAAGTTCTGGAACATTCAGAAATTTTCCCA  
ATTTTTCTAGAAAGTTCTGGAACATTCAGAAATTTTCCCAATTTTTTCTAGAAAGTTCTGGAACA  
TTCTAGAAATTTCCCAATTTTTTCTAGAAAGTTCTGGAACATTCAGAAATTTTCCCAATTTTTCT  
AGAAAGTTCTAGAACATTCAGAAATTTTCCCAATTTTTTCTAGAAAGTTCTGGAACATTCAGAA  
TTTTTTTCGAAATTTCCAGAAAGATTCTAGATTTCCAGAAATTTTAGAATTTTCAGAAAATTTAAAT  
TTCCCGCAAAAATATTTTTTCACAGAAAATTTAAATTTCCCGCCAAAATATTTTTCTCAGAAAAT  
TTCAATTTCCCGCCAAAATATTTTTTCTCACAAAATTTAAATTTCCCGCCAAAATAATTTTTTTTCT  
AGAAAATTTCAATTTCCCGCCAAAATATTTTTTCTCACAAAATTTAAATTTCCCGCCAAAATAAT  
TTTTTCTCAGAAAATTTCAATTTCCCGCCAGAAATTTTTTTTCTCCGAAAATTTAAATTTCCCGCC  
AAAATTTGGGGTTACCCCGGTGGGGCTCACCACGACGGGTCTCACCACGGTGGGTCTCGCCA  
CGATGGGTCTCACCACGATGGGTCTCACCACGATGGGTCTCACCACGGTGGGTCTCACCACGAT  
GGGTCTCACCACGATGGGTCTCGCCACGATGGGTCTCGCCACGATGGGTCTCACCACGATGGGT  
CTTACCACGATGGGTCTCACCACGATGGGTCTCGCCACGATGGGTCTCGCCACGATGGGTCTCA  
CCACGATGGGTCTCGCCACGATGGGTCTCGCCACGATGGGTCTCACCACGAAGGATGACAGACC

CCGCCACAATTCTCAGTGACTTTGGGTGTGACGTCACAGACTACAAAGACTACATAGACTACA  
AACTATGGAACAAACGGAATTATTTTTTTATATATAAGTAATGATAAGTAATGATATATATTGA  
AATTGAAAATATGACTTCGACAGATTTTCTAATTTCTTAATTTTAATTACCGGATTATTTCTC  
TAAGTAAGCTACGCCCTTTTTTCTGTGCCGACTCTGGTTTTCTTAATTTTCGACAAAAATTAT  
GAAAATTATTTATTAATAAAGTATATTTAAACCCGATATTTGGAGAATAATACATTTTGTATC  
ATTTTCTGTTCTGAAAGCGTGGTAATTAATAAATTTGATTAGCCAAATTGAATATTTTCCAA  
AACCAGTGGGTTTTCTTAATTATTTTTTTAAGTCACGATTTAAAGGTGCAGTAGAGGCCAAAA  
AATTTTTTGTCTCAAATGACAGAAAATGCACCCAAAGAACCGAATATAACTGTAAAAAAATTTT  
TTTTTAATTTCTAAATTTTTTATGATTTTTTTTTAATTTTTTCAAAAATCAAAGAAACGGCTGAAT  
AACTTGAATTTAATAAATGAGTGACGTCATTTTTTATATGTTTCGCGTTTTCTGGCTAAATTCG  
TCGTTTTTCTCAATTTTTTTTTCTATATTTGATTTGAAACACCGTTTGTCAATTATCAACCA  
CTTTTCCATAAAAAAAACCTTGATAACCCTAAGGAAATTGCCAGAAATGGCAAAATTTGGCCTAA  
AATCCGCAATTTAACATTTATTATTAATTTTTTTTTTCAAAAATAACTATTTTAAATAATTGACAA  
ACAATGTTTCAAATCAAATATAGAAGAAAAAATGAGAAAAACCGACGAATTTAGCCAGAAAAC  
GCGAAAATATCAAAAATGACGTCACTCATTTGCGCGGTAATTCAAATTTATTCAGCCGTTTCTT  
TGATTTTTGAAAAATTTTAAAAATCATAAAAAATTTAGAAATTTTTTAAAAAAATTTTTTACAGT  
TATATTCGGTTATTTGTGTATATTTCTGTTCATTTAAAGCAAAAAAATTTTTTGACTCTACTCC  
ACTTTTAAAAAACACCAATTCTCACTTTTTAACATCGTCCGAATGATCCAACCGCTTCATTTG  
ATCATCTCGAGTAGCTAAATCTGCGGTGAAACCAAGTGATTTCGACAACATTTATAATATCCCTC  
GGACCAATAACCTGTGGAGAGAACTCGACAAGAGCCATTGATGTAGCAATTGAGACATTACACG  
AGTCAATTCCCGATTTTGAAAGTACATGGGATTCATTCGATTCGCGTCGCTTCTGTGGAGAG  
ATTGCCGATCTGAAATCATTTTTCATATAATTTATACGGATTAAAAAATTCGATAACTCAGAAAT  
GCCGACTGAAAATTTTTACTGAAAATTTTTATAACACAGAATTGGGGAGCTTTTTAGGTTTTAGA  
AAAAACCGCATTTCTTCACTAACTTTTCGAATTTAAGCTTGGTAATTACCGAATTTCCATAA  
ATTTTCGAAAAAATAACATATATTGCCAGTCAATATTTGAAAAAATTTCTAGAGAATTTCA  
AAGCCTATGCAAAATTCGCGATTTGCCGATTTGCCTAAAAATTTCAATTCCTGCATTTTGCCGAT  
TTGCAGGAAAAAATCGTTTTGCCGCCACTATGCCATAGAATAAATTTTTTTTTTGATTTTTTTTC  
AATTTTTTCGAACGAATTTCAAAAATGTCGAAATTAATCATCCATTTGCGCGGGAATTTAAAA  
ATTGTTTCAGCGGTTTGAACTTTTTTGCTAACTTTCTCAAAAATGATATATTTTTTGGGCAATT  
TGAGTATGTTTGGGAATTCAAAAAATAATGTTTTTGGTACCAAAATCCAAAATCACAATCAA  
CCGTATCTTGCTATAATTCGGATTAGCTCCCATAGAATCCAGAAGAGTAGCCTTATATCCAAGT  
TCTCCCGTCATATGTTCCCGAATCGCGTCGGAAGATGTTACCCGACCATCATAAATGACTTCAG  
CTTTCGCAGCAATCAGTGCAACCACAATTGAGTGAACCTCTTCGATTTTTGAAATATTTTCGTT  
AATGTACTGTACACACGAAGCACACGTCATTCCTTCCACTGCGAATGTGCATTTTTTCGAGATGA  
TCCGATGAGCCCTGAAATTAATCATATTTTTAATAAAGATTCAAATAAGGATTTGATAATTTA  
GAATAATTTATGAAAATTTCACTACAAAAATCACAAAAATCATATTTTCAGCGAAAATTTTG  
AAAAATCACTGAGAACTCAGTTTTAGAGCGAAAAGTTCAAAAATAGCTCAAAAATCATATTT  
CCCAGCAGAAAAACTGCGAAAATTCAGTAAAAATGTTTTTTTTTTTCAATTTTTTGGGCTAAAA  
TACAAAAATGTCAGTTTTTTCATTAAGGTGGAGTAGCGCCAGTGGGGGAAATTGCTTTAAAC  
ACGCCTATGGTACCACAATGACCAAAATATCATGATAAAAAATTCAAAAAATTTTCTAAATTT  
ATATGATTTTTTGAAAATGAAAAAATCTCAGTTTTTGCCTAATTTCCAATTTGAATTACCGCCA  
ATTGGAGTTGTTTCGATGGAGCGCGCTTGCACGTTTTTAAATTTATTTATTTTTTTTTTGTTA  
TTTTCCATCGATTTTTAATGTTTTTGGTGTATTTTTGCTTGAATTTTAGAGAAAAAGTCAAGA  
TAAATGCAATTTTCAATTAATAAAGCACGCTTGCAGGCGTAAAAATTACAAAGTAACGATTTA  
AACGATTTTCGAACCTGAATTAATTAATTTCACTGATTTACGCCTGTAAGCGTGTTTTTTTATCG  
AAAATTTGCATTTATCTTGACTTTTTTTCTCTAAAATTCAGCAAAAAATACACCAAAAACATTG  
AAAATCGATGGAAAATAACAAAAAATAAATAAATTTAAAAACGTGCAAGCGCGCTCCAT  
CGAACAACCTCAATTTGGCGGTAATTCAAATTGGAATTAGGCCAAAAACTGAGATTTTCTCAATTT

TCAAAAAATCATATAAAAATTTAGAAAATTTTTTGAATTTTTTTATTATGATATTCGGTCATTGT  
GGTACCATAGGCGTGTTTTAAAGCAATTTCCCCACTGGCGCTACTCCACCTTTAAATATCTTAT  
TTAAAAACCAGAAAATTC AATTTTTG CCTGGAAAAAGTTTAGTTTTTTTTTTTTTTTGAAAAAAA  
TAATACAACTTTTTTGGTCGAGTTGTGAAAAACTTTCCGACATTTTTTTAAAAATTAAC TTCTAT  
TTTTTTTTATTATCAAGTTTTAAGGTAACGTATTTAGAAA ACTATAAGTACTCTATTTATCACA  
AAAAATATTAACCTCTTTCGAATATTTCACTCCATTCAGCTGTA ACTCTACTTTTCCATCAGAT  
AAGTCAACTGTTTTAAGGGGACTTATCGATAATTTTGTGGTAGATGCTTTTTTGGGGTTCCACTG  
CGGCGATTTCTGCAAAAATTAATTTTTGAAAAGTGTTAAACAACACATTTTTAAATCATACTTGA  
TCAGTAATCAATTTACAATCAAATCCCATATCATCAATGGACTCGGCAACTGATTCGCCGTTCC  
ATTTCTCGGAATTATAGTCGACGGTTCC TGAAATTGCAGTCGTTGGCAAAATAAATTTTGAATT  
AAGAAAAATCAAATTTAATATTATGCAGACGCGAAATTTTGTGTTAAAAAAGGTACATTTCCGGT  
AATTGGGAATAGTTTTTGGTTTTGTTTTCTTTTTTCAGAACATATTTATATATTTTTAATTTTGA  
AATATTTTTTTGGAGGCAGCACCTTTGCAGAATCATAATAATTTGGCAAGGAAAATTACCTTGTT  
TCTGTTCCAAACTAACAACAATCTTCACAATTCCATCTTTTTGAGCCTACAGTATCTTGAATATT  
GTTACACAAGCATGGCAGGTCATTCCCTCAATAGAGACGATTGCTCTACGAATTTTGGGTTTT  
TCTGCCATTTGTGTAGGAGGTTCTGCAAAAAAACGTACATTAGATTTTGTGGAAAAATCAGGTA  
TAGATATGAAATTTGAATGATAGAAAAAAATTTATCAAATTA CTGTTTTTTTTATTGGAAAAAA  
AAAGTTTTTTCTTG GATTCCCTTG GATTTACTTTCTTTGGATTGAAAAATAAAATTTGCCGGAA  
AACTTCAAAAAAGTAGCCATAAACTAATTAGAAATTCAAAAGTTTATTGAAATTTATTAGGATT  
TTCAAATAATTTTTTATATTTGATCAATACGATTCTTTCTAATTTTCTGAAGAAAAAAAAGCAG  
AGTTCTATAAAACAATCAATTTTCATTGAAAGCACGTAGACAACCCACTTTTCGTAAAAATCTAA  
TTTCACTGGAATCATTGTCTTCCCTTATCACTATCGTTTTTTTTTTGTATTTCTAATCAGTATCAG  
CGAGCGCGCAAACCAACTTTTTTCGCACTGCAGAAGACGAGCAAATTTATGGGTTAGAAAAAATG  
CCTTAGAATATTTAACAATGACGAAATTTTCTGGCACCGTGAGGTT CAGAATTTAGATGTTTTT  
TTAAACGTTTTTCTCTCTGTAAACAGTTGATTTTTTCAATGTTCAAAAATTTATGATACTGTAGC  
TGAAAACTTTTGCTCTCTTCATGGCCAAGGGCGTCATTTTTTCGATTTTTTCGATGTTTCAAGGAG  
GAACGAAAAACGAAAAAATTTTCGATTTTTCTGGAAAATTGAAAAAAAATGTT CAGAAAATTAACC  
ATAAAATTCGATTTTTTTTTAAATCTAATTTTCTTTACATATATTGGTGAGAATTTCAAAAAACAA  
GAACGATGATTA AAATTTTAAGCTAATTTCACTGCAACTTTTTCTC CACGAGGGACGAGGCAAA  
AAGTTTTCTAGGCCATGGCCGAGTCCCCGACAAATTT CAGCGGCCATTTATGTTGCTTTGTTTT  
CCGCGTGTTTTCTTTTTGTTTTGCACCAATTTTTCCCGTATTTTCTTATTA AAACTAATAAATAA  
ATATTTTTTTGCAGATGCTAAAACAATTTCC CAGTGAAAAAAGTATGTATTGAGTCGGTAAGTAG  
CGGTGAAAGTGGTCAATGTAATATGATGGATTACGGAAATACAAAACCTAAACTTTTTTCCCAAG  
CATGATACATATGCTGCTTAAATGCTGAAACTACCTGATTTTCATAACGAGATCGCTGAAAAAG  
TTTTGAGGTTTTTCAAAATTC AACTTTTTTGGTGAAAAAGTAGAGATTTTCGCACAAAATGTTGA  
ATTTTAAAAATCTCAAAACTTTTTTCAGCGGTCTCGTTATGAAAATCAGGTAGTTTCAGCATCTA  
AGCAGCATATTTATCATGTTTTG GAAAAAAGTTTAGGTTTAGTATTTCCCGTAATCCATCATATAA  
CATTGACC ACTTTCACCGCTACTTGCCGACTGAATACATAATTTTTTCATCTG GAAATTATATTA  
GCATTAGCAAAAAATATTTATTTATCAGTTTTAATAAGAAAAACGGGAAAAATCGGTGAAAAC  
ACAAGAAAACAAAGCAAGTACAAAATGTCGTTAAATGCGGTGTATTGTGTGCAAACACCGATTT  
TTCGCATTTTTTCTCGGCCCCCGTTTTGAAAAAAGTTGCAGTGAATTTTAGAAAAAATCGAAACT  
TTTCGATTTTTCCAAAACCAAAAAATCTAGAAATTTTTGCCCAAATTA AAAGTATTTTTTATGTTG  
AAAAACTGGTATCGTAAAGCGTTTGCGATAAGGTAAAACGAAAAATAAACTGAAGTATTTGTT  
TATTTTTTTTTCTATTTTTCTATAAACCTCCTCGTTAACAATCGAACTGATCTTTACCTTTTTT  
CAAACTTTGCAATCAAACCCATATCATCGACAGCTTCAGCCACTTTCTCAGCTGTCCATTTT  
GTAGTATCAAATGAACATTTTGCATTTTCTTCTTTTAAATTCAC TTGGATACTATGAATTCCTG  
GCTTCGCTCCAATTACGTCTTGAATATTTTTTGACACAGGAGTTGCACGTCAATTCCTCTGGAAAA  
TGTGACTATTTTTTTGTTAAAAATTTAGATTTTGAACAGCTAATTTGCAGAATTTTTCTTTTTTT

TTTGTTGTATAAATCGAAAAATTAATCATTTTTAGTTAAAAAATCGAACAAATTTAAAAATAAGTG  
CAGAAAAATATGTTTTTAAAAAAGTTTTTCGAAAATCTTATCGGAAAACATACAAAACCTCAAC  
CTTTAAGTTAAAAATTATATATGAAAATGCAGCAAAATGCCTTTAGATCTGAAAATAATATTTA  
TTTTTGTGAAAAATTAGTTTTAAAAACCCCAAATGGGGCCTGAGAGTTCCTGTTTTCAAAAAA  
AAATTGAAGGAGACTGTCCGACCCTATTTGAGCTCTTTTTTCACTGAAAAATTAATATTTTTCA  
GATCTATGAAAATTTTAATCAACAGTTTTGCCAAGCAAAAAATCCAAATTTTAAAAACTTTA  
AATTCATTTACTTAATCTCCAGCATTGTTTCTTGACATTTCCATCCGTCTTCGGTGCTCCAA  
AATCCACCAAAAGTTGAATATTTTTTCGACGGAGACGGACGTGGTATTGATGATGTTGATGGACG  
TGATGGAAGCGGCGAACCGTTCGAGAAGACTCACATTTTCCGACATTTTGTGTACTCGATAAAT  
CACATGAGAATTTGGGAAATGATTTGTT

**Sequence of *cua-1(gk107)* :**

TTAAATTTTTAAAAAATGTTTATTAAATTCGATTCAAAATTTGGAAAATACAAGAAAAATAAGGC  
AAAAATCACAAATTAANAACAATAAAACCGCGTAAAAAATGGAATTTGGTTCGGTATGTGTGTGA  
TGAGAGTGAGATGACGAAACGAAGCACGCAAAATGTACAAAAAATTTGGATAAAAAATCAAAAA  
ACTACACAATGAGATCCTCTAAATCTGATCCAACATTATCCAAAAGTCGTTGCTTTTTTCGAGCT  
CCCAGAGCTCACGATACTTGTGTTGAGCCGAGCAGTGAGCCAACCTTTTGAGCTTAATATTGAT  
AATTTTGAAGAAGCAGCACCTCGAAAAACAGCCGAATCGTCTAGGCCTCGATGCACCTTGAACCT  
GGAAAGAGCCCGATTCGAGGAACTTCTGATGTCGTTTGAAGCTCGTCGTATAGAGATTTGCAAT  
CGTTGGTTTTTCGGAAGTTTTTTGAGTAAAAGTGAAGAAGAAACCACGGAGACACTGGAAAGAGCC  
ATTGCAGCTGCAGCCATCCATGGTTGAAGCATGAAGCCAAATGGGCGGAATACACCTGGAAAT  
TGGAAAATTTATTAAGTGGATTGTTTTTTGTTATTGGAAAATAGCGTTTTCTAGAAAAACAA  
TATTTTCTTCTTTTTTTTTCTCAACGAAAATCAACGAAAATTTCAATTAATTTTGAATTTTTCA  
AATTTTCCAGACAAAAGTAGAAAATTTCCGTTTTTTTTCTCGAAAATAGCTTCAAACCTAAGCT  
ATTTTTCTTTTTTTTTCGAAAATTTTTTTTTCTTAAGTACTTCTCAACAAGATAAACCGAATTTGA  
TAAAATTTTGAATTTGTTTAAAAATTTTTCTAGACGATTTTTTCGTTTTCCGGGTATTCGAAAAGTC  
GAAAATTTTGAATTTTTTTTTGTTCGAAAAAAAATTACCCGGGTTTTTCGAAAATAGCTACAAAT  
TTTGACCAATTTTCTTTTTTTCAGAGAAAATATAATTTTTTAAAGTTTTTCTCTTCAAAAAAAT  
GATATTTAAAATTTCAAATTAAAAAAATGTTCTAGACATTTTTTTTTCAATTTTTTTCGTTTTTCG  
GAAAATTGAAAATTTTTTCGACATTTTTTAACACTTTTTTATTCTACCATTTGAAATCGGTTTTTTTT  
GTTTCGAAATAACTTTTTTAAAATTCACCTGCAGCAATCGGAATCCAATCGCATTATAAATGAT  
TGCAAACAAAAGTTCAATCGAATCCTTCTCGTCGTCATTTTCGATAGCTTAATTGCTCCAACA  
ACATCCACAAGATCATTTCTAACAAGTACGATTCAGCTGACTCAATTGCCACGTCACTTCTCG  
CAGCAATTGCGATACCAACATTGGCTTCTGCGAGAGCCGGCGAGTCGTTGACACCGTCTCCAAC  
CATTGCAACTTTGTTTTTTGTATCCTTTCAATTGCTTAATCTTTTGTTGCTTTTGATTTGGAAGA  
ACTTCTGCGAATACTTCATCAATTCGACTTGTTCGCAGTTGATTCTGCAGTTTTTCGAGTTAT  
CTCCTGTGAGAAGTACGACACGAAGACCCATTTACGTAGAGTATAGATTGCAAGTGATGCTTC  
TTTTTTAACTTGATCAGCAATTGAAATTACAGCAACCCTTCCGCTGAAATAGTTAATTTGTCA  
ATAACTACAGCTGTTTTGACAGACGAAATTTGACTTTTTTTCATTAAAAAAAGGATTTTTTTCAG  
TGGAGTAAAAGAATTTTTTAAAGCAAGATCCAAGAGCAAGATCCAAGACCAAGAAAAATATACTA  
GTTTTTTTTTGGTTTTTCTTTGGAAAAAATGACTTTTTTTGAGTTTTTGGACCAAGAAAACAGTT  
TTTTTTTTCAAAAATTTGTAATTTTACTTGGAAAGGAGAAATACAATTAANAAGTGTTTTGT  
TTTTGGTCCAAATTTCAAATTTTGTAAAAACGGCGAACATTCAGCAAAAATCTTTAAAGGCAA  
GGTAAAATTTCCCTCCAAAATAAACGAATGATTCATTCAAATTCAAAAGAGTGACGCCCTTTA  
AGGATAACTGTAATTTTATTGAAGAAGCGAAAAGTGAANAAGGAATACACAAAATTTTTGGGAAA  
AACTTTAGCAACTACAGTAAGAAAATTTGTCGTGTCGAGAACCAGGTACCGTAGCTTTCGAACA  
AAAATGAAAATTTTTGGTTCTGAACACTGAAATTTTTTAAAATTAGGTGTTAATATTGGGAAT

TTAGCGAAATTTTATTTTTGAGAAATATTTTAATTTTCCAATAATTTCCAGTCACTTCTTGATT  
TTTAAATAAATTTGCTTGTTTTTTTTATCGTTTTCCGATTTTTTTTTGATTTTCTCTGAAAATCA  
ACGAAACAAAACTTACCGTTAATTGCACAAATAACCGAAATGTGTCCTTTTCTCTGTTCTTCT  
GAAAGTGCATTTTCACAACCTCCGATACGGGAATTCGGTGTCTTTCCATCATTTCTTCGGTTC  
CAATCACAATGTTTCGCAGTGTCCGGGTTTGGTTGGCTAACTTGAAATTATATGAATTTATATTC  
ATTTATAAATTA AAAAGACTACCTTCTTTACTAGAACTTGAAAGTAAATTGACTTCGGTTCAG  
GAATCGTGATAGTTTGACCATCAGGAAGCCTTGGAATTTCACAAAGTAGATCCAGAAAGTGCCAA  
AGACGAGAACGACTGCCGAATTGAGTCAATTCTACAGGTAACACCATGTCCAGCAGATACATGG  
AATCGGGAAGTGTTCGGCCAAGTTGGCTCATTGAGAAGCTGAAAAAATGGATTTTCTTGTTTTT  
TTTCAGTTTTTTTTGGCAAAAATTGATTTTTTTTTTGTATTTTTTTTTTGGTTGGTATGATGAGAAA  
ATCGAATTTTTTTTTGTTTTTTTTGTTGGCAAAAATGGATTTTTTGTTTTTTTTTTTTTGTTTTT  
TTTTGTTTCTTGATTTTTTGTTTTTTTTTTTCGGCAAAAATAAATTTCTGGTTTTTTAATAATTTT  
TTTTTTGCAAGAATAGATTTTTTTTTTTTGGTTTTTTTTTGGTTGGTATGATGAAAAAATCAAAAA  
CTTTTTTTTTTCCGTTTTTTTTTTGGAGAAATCCGATTTTTTGTTTTTTGATCCAAGTTTGAAACA  
ATTTTTTTTTCGTTTTTTTTGGTTCGAAATATTTTACTCTCTTTACTCTTAAATAACCTGTTTCGCA  
AAAGCCGCTACCGCATTTCCAATCGGATGCTCCGACAAAGCTTCAGTGGCTCCGGAGAGGAATG  
TGATAAGTTTTAGTGACATTTGTAGATGGATTTACAAACGACGCAATTTGAACTACTCGTGGACG  
TCCTTCGGTGATTGTGCCAGTTTTGTTCGAAAACAATTGTGGTTACCTGGAAAAAAGAGTGATTA  
AAAAATTTGAGATTTGATAAATATTGCTTTTTTTTTGTTTCATATTAAGATAATTTTGTTAATGTT  
TCGATTTTTCTTTTTTATTTATTTTTCCCTGAAAAATATCGAAATTCGCGGTTTGAAAAATGGA  
TCTTTCTTTATTTCTCGATTTTTTTTTCGTTTTTTTCGTGCAATTTCTGATTTACACTAATTTGG  
ATATATTATATCTTTAGTGGCTTCGTGAAATTTTAAAAAATTATTTTCTGATATTTACGAGTG  
AAAAATAAAAAAATGGTACTCTAAGAAACAAGGTTTTTTTTTCTGGGAAGTAAAAACATCTAAAT  
TTTTGTTTTTCGATGTTTCAAAATTTTCGGTTATGTCTCTTCTATTTGAATTTGAAATAAATATGT  
TTTTTAGTGTTGTTAATATGAGAAAATGTTTAAAATTTTGACAGTGACATCCAAATTTCTAAAT  
CCGAACTCACTTTATGTACTCTCCAATGGTTCGCCCTCTTTAATCAAAATACCATTTGCTGC  
TCCAACCTCCAGTTCCAACCATAACAGCGGTGGGCGTTGCGAGACCCAGACTACAAGGACATGCA  
ATTGCAAGTACAGTAATCGCAGCTTCAAATGCGATTTTCAAGGCTTCTTCGAATCGAAGACCGG  
GTGGCTGGAAAAATACATGATTTTGATTAAAACTCGGGCTTTGGCTTTAAATTTTAATTTTTTCA  
AATCGAATTTGCAATATGCAATAAAAATTTTTTTTTTTTAAAGCTGATCTTGGAAGCCAAGAT  
CTTGGCGGGCTTTAATTTGGGAAATTTAGCAGCGAGGAACGAAATTTCTCGATCTTCTTATTTAC  
AGCTCTTTTTGAAAATTTTCAAAGCAGCACAATCAATTTTTTAAAGATCCAACCTGAAAATTTGC  
TCATGAATTTCTTCTTTGCTGCTAAATTTATAATCATAAATTCACGTTTTTCGAGCATTTCTGAA  
TCCAACCTTATAGTATTTAATCTATTTTTCCCTTACCAAATTAGCATTTCTCGCCGAATTTGTAC  
TCAATATAGATCCATACTCCAACGTGAACAACGATAATACAATGACAAACGGGACAAAGTATC  
CGGCAATTTTATCGGCAAGTTGTTGAATTTGGAGCACGATTCGTTTCCATTTTTTTTTTCTAAAA  
ATTATAGTCGATTTTTTTTTTGTCTTTACTTCCGTGTTTTTCGGAGGAAAATTTATTTTTTTCGCAA  
TTTTTCGAAGAAAAATTTTTATAACAAAAAAACAAAATTTTAGTCCTAAAATTATACCCGAATTT  
GTTTTTATTGGGTTTTTTGAAAAAAAATTTTTTTTCGTGTTTTTTGGCCAAAAAATTTATTTTT  
TCAATTTTTGAAAAAAAAGCAAAAAAAGAAAATAAATTTATTAGCCTGTGATAACTGGAAAAT  
TCATAAAAATTTAAGTTAAGCTCTTTTTTCTTAAATTTATAATTGAATTTTTTTTCTTTTTTTT  
CGTGTTTTTTCATGGGAAAATGTTATTTTTCAGAATTTTTTCAAACATATTTTTTTGGTAACTGAA  
AAATATTTTTTTGGCTACTCCAAAAAACTTCTTTTTTATTGGTGTAACCTGAAAATTTCTCACCT  
GAACCGGTGTGCAAAGACATAAAAGCAGAAAGTTGTCAAGTGAAAGAGCTGGAGTGAAAATTTGG  
TGTTTGTGTGCTGGATGCATTGGCGTTCGGAGAATCCAGTGAAAGATTATCATAATTATCATT  
ACAGGGACTCCGAATATTAATGCGATGAAGAAAGTGTTACGCCATCTGAAAATACCGTTATTGT  
GAATTTTTGCTTGAAAATAGTCGAAAAAAAATAATATAACCAGCCGCTGACCGCGCCTACGG  
CGCGGGCAACGACTGGCACCATTAAGTATTTGACACACATACCTTCAATCACTCAAAAAAT

TCTCATCATGAAAAAACTTGACACACTTAAACGCGGTTTACTGGCACTGTTACACGTATTTTT  
CTACGACATGCATGTTTCGAAAATTCACAGACAGTATGAAAACGTTCTGTTACTTTCTGACCAA  
GACAGTAACCTTACAATACCACTACAGTACCTTGACATTATCCTCCACCGACTCCTAACTCAAT  
ACCTCTTCAAAGGACGAAATGCCAATTTTTCCAAAACCTACAGTAACCTTACCGTATACCTACAG  
TACCCCTATAGTACCACTACAGTACCTTGACTTAATCCCCATCAACTCCCAAATAACTACCTC  
TTCTAAAGCTCTAAGCTCAATTTTTTCGGAACATTCCAGAATTTTCTCGATTTTTCTAGAAAGTT  
CTAGAACATTCAGAATTTTCCCGATTTTTCTAGAAAGTTCTGGAACATTCAGAATTTTCCCA  
ATTTTTCTAGAAAGTTGTGAAACATTCCAGAATTTTCTCGATTTTTCTAGAAAGTTCTGGAACA  
TTCCAGAATTTTCCCAATTTTTCTAGAAAGTTGTGAAACATTCCAGAATTTTCTCGATTTTTCT  
AGAAAGTTCTGGAACATTCAGAATTTCCCGATTTTTCTAGAAAGTTCTGGAACATTCAGAA  
TTTTCCCAATTTTTCTAGAAAGTTGTGAAACATTCCAGAATTTTCTCGATTTTTCTAGAAAGTT  
CTGGAACATTCAGACTTTTTCCGATTTTTCTAGAAAGTTCTGGAACATTCAGACTTTTTCCCA  
ATTTTTCTAGAAAGTTCTGGAACATTCAGAAATTTCCCAATTTTTCTAGAAAGTTCTGGAACA  
TTCCAGACTTTTTCCGATTTTTCTAGAAAGTTCTGGAACATTCAGAAATTTCCGCGATTTTTCT  
AGAAAGTTCAGGAACATTCAGAATTTTCTCGATTTTTCTAGAAAGTTCTGGAACATTCAGAC  
ATTTCCCAATTTTTCTAGAAAGTTCTGGAACATTCAGAAATTTCCCAATTTTTCTAGAAAGTT  
CTGGAACATTCAGACTTTTTCCCAATTTTTCTAGAAAGTTCTGGAACATTCAGACTTTTTCCCA  
ATTTTTCTAGAAAGTTCTGGAACATTCAGAAATTTCCCAATTTTTCTAGAAAGTTCTGGAACA  
TTCCAGACTTTTTCCCAATTTTTCTAGAAAGTTCTAGAACATTCAGACTTTTTCCCAATTTTTCT  
AGAAAGTTCTGGAACATTCGAGAATTTTTTCGAAATTTCCAGAAGATTCTAGATTTCCAGAATT  
TTAGAATTTTCAGAAAATTTAAATTTCCCGCAAAAATATTTTTTCACAGAAAATTTAAATTTCC  
GCCAAAATATTTTTCTCAGAAAATTTCAATTTCCCGCCAAAATATTTTTCTCACAAAATTTAA  
TTTTCCCGCCAAAATAATTTTTTTTCAGAAAATTTCAATTTCCCGCCAAAATATTTTTCTCACA  
ATTTAAATTTCCCGCCAAAATAATTTTTTTCTCAGAAAATTTCAATTTCCCGCCAGAATTTTTTT  
CTCCGAAAATTTAAATTTCCCGCCAAAATTTTGGGGGTACCCCGGTGGGGCTCACCACGACGG  
GTCTCACCACGGTGGGTCTCGCCACGATGGGTCTCACCACGATGGGTCTCACCACGATGGGTCT  
CACCACGGTGGGTCTCACCACGATGGGTCTCACCACGATGGGTCTCGCCACGATGGGTCTCGCC  
ACGATGGGTCTCACCACGATGGGTCTTACCACGATGGGTCTCACCACGATGGGTCTCGCCACGA  
TGGGTCTCGCCACGATGGGTCTCACCACGATGGGTCTCGCCACGATGGGTCTCGCCACGATGGG  
TCTCACCACGAAGGATGACAGACCCCGCCACAATTTCTCAGTGACTTTGGGTGTGACGTCACAG  
ACTACAAAGACTACATAGACTACAACTATGGAACAAACGGAATTATTTTTTTATATATAAGTA  
ATGATAAGTAATGATATATATTGAAATTGAAAATATGACTTCGACAGATTTTTCTAATTTCTTAA  
TTTTAATTACCGCGATTATTTCTCTAAGTAAGCTACGCCCTTTTTTTCTGTGCCGACTCTGGTT  
TTCCTTAATTTTCGACAAAATTTATGAAAATTTATTTATTAATAAAGTATATTTAAACCCGATATT  
TGGAGAATAATACATTTTTTGATTCATTTTCTGTTCTGAAAGCGTGGTAATTAATAAATTTGAT  
TAGCCAAATTTGAATATTTTTCCAAAACAGTGGGTTTTTCCCTAATTATTTTTTTAAGTCACGAT  
TTAAAGGTGCAGTAGAGGCAAAAAAATTTTTTGCTTCAAATGACAGAAAATGCACCCAAAGAAC  
CGAATATAACTGTAAAAAATTTTTTTTTAATTTCTAAATTTTTTATGATTTTTTTTTAATTTTT  
CAAAAATCAAAGAAACGGCTGAATAAACTTGAATTTAATAAATGAGTGACGTCATTTTTTATAT  
GTTTCGCGTTTTCTGGCTAAATTCGTCCGTTTTTTCTCAATTTTTTTTTCTATATTTGATTTGAAA  
CACCGTTTGTCAATTATTCAACCCTTTTCCATAAAAAAAACTTGATAACCTAAGGAAATTG  
CCAGAAATGGCAAAATTTGGCCTAAAATCCGCAATTTAACATTTATTATTAATTTTTTTTTTCAA  
ATAACTATTTTTAAATAATTGACAAACAATGTTTCAAATCAAATATAGAAGAAAAAATTGAGAAA  
AACCGACGAATTTAGCCAGAAAACGCGAAAATATCAAAAATGACGTCATTTTGC GCGGTAA  
TTCAAATTTATTTCAGCCGTTTTCTTTGATTTTTGAAAAATTTTAAAAATCATAAAAAATTTAGAA  
ATTTTTTAAAAAATTTTTTACAGTTATATTCGGTTATTTGTGTATATTTTCTGTCAATTTAAAGC  
AAAAAATTTTTTACTCTACTCCACCTTTAAAAAACACCAATTTCTCACTTTTTTAACATCGTC  
CGAATGATCCAACCGCTTCATTTGATCATCTCGAGTAGCTAAATCTGCGGTGAAACCAAGTGAT

TCGACAACATTTATAATATCCCTCGGACCAATAACCTGTGGAGAGAACTCGACAAGAGCCATTG  
ATGTAGCAATTGAGACATTACACGAGTCAATTCCCGATTTTGAAAGTACATGGGATTCTATTTCG  
ATTCGCGTCGCTTTCTGTGGAGAGATTGCCGATCTGAAATCATTTTTCATATAATTTATACGGAT  
TAAAAATTCGATAACTCAGAAATGCGGACTGAAAATTTTTACTGAAAATTTTATAACACAGAA  
TTGGGGAGCTTTTTAGGTTTTAGAAAAACCGCATTCTTCACTAAACTTTTCGAATTTTAAGC  
TTGGTAATTACCGAATTTCCCTAAAATTTTCGAAAAAAAAAAAAACATATATTGCCAGTCAATATTT  
GAAAAAAAAATTTAGAGAATTTCAAAGCCTATGCAAATGCGGATTTGCCGATTTGCCCTAAAAA  
TTTCAATTCCTGCATTTTGCCGATTTGCAGGAAAAAATCGTTTGCCGCCACTATGCCATAGAA  
TAAATTTTTTTTTGATTTTTTTTTCAATTTTTTCGAACGAATTTCAAAAAATGTCGAAATTAATC  
ATCCATTTGCGCGGGAATTTAAAAATTGTTACGCGGTTTGAACTTTTTTGCTAAACTTTCTCAA  
AAAATGATATATTTTTGGGCAATTTGAGTATGTTTGGGAATTCAAAAAAAAAATGTTTTTGGTA  
CCAAAATCCAAAACCTCACAATCAACCGTATCTTGCTATAATTCGGATTAGCTCCCATAGAATCC  
AGAAGAGTAGCCTTATATCCAAGTTCTCCCGTCATATGTTCCCGAATCGCGTCGGAAGATGTTA  
CCCGACCATCATAAATGACTTCAGCTTTTCGCAGCAATCAGTGCAACCACAATTGAGTGAECTCC  
TTCGATTTTTGAAATATTTTCGTTCAATGTACTGTACACACGAAGCACACGTCATTCCTTCCACT  
GCGAATGTGCATTTTTTCGAGATGATCCGATGAGCCCTGAAATTAATCATATTTTTAATAAAGAT  
TCAAATAAGGATTTGATAATTTTAGAATAATTTATGAAAATTTCACTACAAAAAATCACAAAA  
ATCATATTTTTCAGCGAAAATTTTGAAAATCACTGAGAAACTCAGTTTCAGAGCGAAAAGTTCA  
AAAAATAGCTCAAAAACCTCATATTTCCAGCAGAAAACTGCGAAAATTCAGTAAAAATGTTTT  
TTTTTTCATTTTTTGGGCTAAAAATACAAAAAATGTCAGTTTTTTCATTAAGGTGGAGTAGCGC  
CAGTGGGGGAAATTGCTTTAAAACACGCCTATGGTACCACAATGACCAAATATCATGATAAAAA  
ATTCAAAAAATTTTCTAAATTTTATATGATTTTTTTGAAAATTTGAAAAATCTCAGTTTTTTGCC  
TAATTCCAATTTGAATTACCGCCAATTGGAGTTGTTTCGATGGAGCGCGCTTGCACGTTTTTTAA  
TTTTATTTATTTTATTTTTTTGTTATTTTCCATCGATTTTTTAATGTTTTTTGGTGTATTTTTGCTT  
GAATTTTAGAGAAAAAAGTCAAGATAAATGCAAATTTTCAATTA AAAAGCACGCTTGCAGGCGT  
AAAAATTACAAAGTAACGATTTTAAACGATTTTCGAACCTGAATTAATTAATTTCACTGATTTAC  
GCCTGTAAGCGTGTTTTTTTTATCGAAAATTTGCATTTATCTTGACTTTTTTTTTCTCTAAAATTCA  
AGCAAAAATACACCAAAAACATTGAAAATCGATGGAAAATAACAAAAAATAAAATAAATAAAT  
TAAAACGTGCAAGCGCGCTCCATCGAACAACTCCAATTTGGCGGTAATTCAAATTTGGAATTAGG  
CAAAAACCTGAGATTTTCTCAATTTTCAAAAAATCATATAAAATTTAGAAAATTTTTTTGAATTTT  
TTTTATATGATATTCGGTCATTGTGGTACCATAGGCGTGTTTTAAAGCAATTTCCCCACTGGCG  
CTACTCCACCTTTAAATATCTTATTTAAAACCAGAAAATTCAAATTTTTGCCTGGAAAAAGTTT  
AGTTTTTTTTTTTTTTTTGAAAAAATAATAACAATTTTTTGGTTCGAGTTGTGAAAAACTTTCCGAC  
ATTTTTTTTAAAAATTAACCTTCTATTTTTTTTTATTTATCAAGTTTTTAAGGTAACGTATTTAGAAA  
ACTATAAGTACTCTATTTATCACAAAAAATATTAACCTTTTCGAATATTTCACTCCATTCAGC  
TGTAACCTTACTTTTCCATCAGATAAGTCAACTGTTTTTAAGGGGACTTATCGATAATTTTGTGG  
TAGATGCTTTTTTGGGGTTCCACTGCGGCGATTTCTGCAAAAATTAATTTTTGAAAAGTGTTAAAC  
AACACATTTTAAATCATACTTGATCAGTAATCAATTTACAATCAAATCCCATATCATCAATGG  
ACTCGGCAACTGATTCGCCGTTCCATTTCTCGGAATTATAGTCGACGGTTCCCTGAAATTCGAGT  
CGTTGGCAAAAATAAATTTTGAATTAAGAAAAATCAAATTTAATATTTATGCAGACGCGAAATTTT  
GTGTTAAAAAAGGTACATTTTCGGTAATTGGGAATAGTTTTTTGGTTTTGTTTTCTTTTTTCAGAACA  
TATTTATATATTTTAAATTTTTGAAAATATTTTTTTGGAGGCAGCACCTTTGCAGAATCATAATAA  
TTTTGGCAAGGAAAATTACCTTGTCTGTTCCAACTAACAACAATCTTCACAATTCATCTTT  
TGAGCCTACAGTATCTTGAATATTTGTTACACAAGCATGGCAGGTCATTCCTCAATAGAGACG  
ATTGCTCTACGAATTTTGGGTTTTTCTGCCATTTGTGTAGGAGGTTCTGCAAAAAAAAAACGTACA  
TTAGATTTTGTGGAAAATCAGGTATAGATATGAAATTTGAATGATAGAAAAAATTTATCAAAA  
TTACTGTTTTTTTTATTGAAAAAAGTTTTTTTCTTGGATTCCCTTGGATTTACTTTCCCTTGG  
ATTGAAAAATAAAATTTGCCGAAAACCTCAAAAAAGTAGCCATAAACTAATTAGAAATTCAAA



AGTTTATTGAAATTTATTAGGATTTTCAAATAATTTTTATATTTGATCAATACGATTCTTTCTA  
ATTTTCTGAAGAAAAAAAAGCAGAGTCTATAAAACAATCAATTTTCATTGAAAGCACGTAGA  
CAACCCACTTTTCGTAAAAATCTAATTTCACTGGAATCATTGTCTTCCCTTATCACTATCGTTTTT  
TTTTGTATTTCTAATCAGTATCAGCGAGCGCGCAAACCAACTTTTTTCGCACTGCAGAAGACGAG  
CAAATTTATGGGTTAGAAAAATGCCTTAGAATATTTAACAATGACGAAATTTTCTGGCACCGT  
GAGGTTTCAGAATTTAGATGTTTTTTTTAAACGTTTTTCTCTCTGTAAACAGTTGATTTTTTCAATG  
TTCAAAAATTTATGATACTGTAGCTGAAAACTTTTTGCTCTCTTCATGGCCAAGGGCGTCATTTT  
TCGATTTTTTCGATGTTTTCAAGGAGGAACGAAAAACGAAAAAATTTTCGATTTTTCTGGAAAATTGA  
AAAAAATGTTTCAGAAAATTAACCATAAAATTCGATTTTTTTTTAAATCTAATTTTCTTTACATAT  
ATTGGTGAGAATTTCAAAAAACAAGAACGATGATTAATAATTTTAAGCTAATTTCACTGCAACTT  
TTTCCCTCACGAGGGACGAGGCAAAAAGGTTTTCTAGGCCATGGCCGAGTCCCCGACAAATTTTCAG  
CGGCCATTTATGTTGCTTTGTTTTCCGCGTGTTTTCTTTTGTTTTGCACCAATTTTTCCCGTAT  
TTTTCTTATTAATAAATAAATAAATATTTTTTTGCAGATGCTAAAACAATTTCCCAGTGAAAAA  
AGTATGTATTGAGTCGGTAAGTAGCGGTGAAAGTGGTCAATGTAATATGATGGATTACGGAAAT  
ACAAAACCTAAACTTTTTCCCAAGCATGATACATATGCTGCTTAAATGCTGAAACTACCTGATT  
TTCATAACGAGATCGCTGAAAAAGTTTTGAGGTTTTCAAATTTCAACTTTTTTGGTGAAAAAGT  
AGAGATTTTCGCACAAAATGTTGAATTTTAAAAATCTCAAAACTTTTTTCAGCGGTCTCGTTATG  
AAAATCAGGTAGTTTCAGCATCTAAGCAGCATATTTATCATGTTTGGAAAAAAGTTTAGGTTTA  
GTATTTCCCGTAATCCATCATATAACATTGACCACTTTCACCGCTACTTGCCGACTGAATACATA  
ATTTTTCATCTGGAAATTATATTAGCATTAGCAAAAAATATTTATTTATCAGTTTTAATAAGAA  
AAAACGGGAAAAATCGGTGAAAAACACAAGAAAAACAAGCAAGTACAAAATGTCGTTAAATGCGG  
TGTATTGTGTGCAAACACCGATTTTTTCGCATTTTTTTCTCGGCCCCCGTTTTGAAAAAAGTTGCAG  
TGAATTTTAGAAAAAATCGAAACTTTTTCGATTTTCCAAAAACCAAAAAATCTAGAAATTTTGC  
CAAATTAAGTATTTTTATGTTGAAAAAAGTGTATCGTAAAGCGTTTGCATAAGGTAAAAC  
GAAAAATAAAGTGAAGTATTTGTTTATTTTTTTTTCTATTTTTCTATAAACCCCTCCTCGTTACA  
ATCGAACTGATCTTTACCTTTTTTCAAACCTTTGCAATCAAACCCCATATCATCGACAGCTTCA  
GCCACTTTCTCAGCTGTCCATTTTGTAGTATCAAATGAACATTTTGCATTTTCTTCTTTTAAAT  
TCACTTGGATACTATGAATTCCTGGCTTCGCTCCAATTACGTCTTGAATATTTTTTGACACAGGA  
GTTGCACGTCATTCCTCTGGAAAATGTGACTATTTTTTGTAAAAAATTTAGATTTTGAACAGCT  
AATTTGCAGAATTTTTCTTTTTTTTTTGTGTATAAATCGAAAAATTAATCATTTTTTAGTTAAA  
AAATCGAACAAATTTAAAAATAAGTGCAGAAAAATATGTTTTTAAAAAAGTTTTTTCGAAAATCTTA  
TCGAAAAACATACAAAACCTCAACCTTTAAGTTAAAAATTATATATGAAATGCAGCAAAATGC  
CTTTAGATCTGAAAATAATATTTATTTTTGTTGAAAAATTAGTTTAAAAACCCCAAATGGGGCC  
TGAGAGTTCCTGTTTTCAAAAAAAAATTTGAAGGAGACTGTCCGACCCTATTTGAGCTCTTTTT  
TCACTGAAAAATTAATTTATTTTCAGATCTATGAAAACTTTTAATCAACAGTTTTGCCAAGCAAA  
AAATCCAAATTTTAAAAATACTTTAAATTTCAATTTACTTAATCTCCAGCATTGTTTCTTGTACAT  
TTCCATCCGTCTTCGGTGCTCCAAAATCCACCAAAGTTGAATATTTTTTCGACGGAGACGGACG  
TGGTATTGATGATGTTGATGGACGTGATGGAAGCGGCGAACCGTCGAGAAGACTCACATTTTCC  
GACATTTTGTGTACTCGATAAATTCACATGAGAATTTGGGAAATGATTTGTT

**Sequence of *fshr-1* gene:**

GTCGCTGCTAATCAAATGACATGCTCAACATATCGATCGATTCAACTTTTTTCAAATCTACTCA  
TTTTTATTCTAATTATACTGTACCTACAAACAATAGAATGCCAGAATGCATTGAGTCTTGCCCA  
GACAAAACATTCATGTATGGCTTTAAAAGCCGAGGATGGAGAAGGATGTACATGCAAACAAACA  
AAACGATATGGACAACCTGAGTGTGTTGTATGGGATTGATTGTGTCTCAATTGCCAACTAACT  
TGACTGCTGACGTTGGATATTTGTGAGTTGTTTCAGGGTTAAGTTCCGGGAGAAAATTTTTGGATG

GAACATGTATTTAATCCTTGCAACAAAAATTGGATTTAATTTCCAATTATAGTTATTGCTGATT  
ATGTACAGTGCTGGCCAAAAAGATATCCACTTTTGGTTTTTTGTGTGTAACCTTTTTTCTCAAGC  
ATCCATTTGACTTGAATTTTTCCGTGTGCATAAAGCGAAATGTTACGCAAATTTGCGGACCAA  
CATTACATGATTATCGATTTTTTCTGAATTTTATTTCAATTTTTTGATTTTTTCGTTTTGCATG  
GAGGTGGGAGCGTCATGGTGTGGGGGTGCTTACCAGCACTTCCATGGGCCCCTAAGGAGAAT  
CCAAAGCATTATGGATCGTTTTCAATACGAAAACATCTTGAAACTACAATGCGACCCTGGGCA  
CTTCAAAATGTGGGCCGTGGCTTCGTGTTTCAGCAGGATAACGATCCTAAGCATACTTCTCTTC  
ATGTGCGTTCCCTGGTTTTCAACGTCGTGTCGATTTGCTCGATTTGGCCAAGTCAGTCTCCGGA  
CTTGAATCCAATAGAGCATTGTGGGAAGAGTTGGAAAGACGTCTTGAGGTATTCGGGCTTCA  
AATGCAGATGCCAAATTCACCAGTTGGAAAACGCTTGAAAGCTATCCCCATGTCAGTTATTC  
ACAAGCTGATCGACTCGATGCCACGTCGTTGTCAAGCTGTTATTGATGCAAACGGATACGCGAC  
AAAGTATTAAGCATAATTATGTTGTTTTTAAATCCAATTGCTCATATTCGGGTACTTTAATTGT  
CATTTCCCTTGCAACCTCGGCTTTTTCAATATTTCTAGTTTTTCGATTTTTTTGAATTTTTCTGA  
AGTTTTTCAAATCTGTTGAACATTTTTGATGAATATTGTGTTTTTAGATTTTGTGAACACTG  
TGGTGAAGTTTTCAAACAAAATAACCACCTTAGAAAAAGTTACACACAAAAAACAAAAGTGGA  
TATCTTTTTGGCCAGCACTGTATATCTGAAGAATATCTATTGATTTATTCTAGGTACCTCCACA  
ATACTTCAATCTCTGTTATTACACCGAACTTTTTTGATAAATCCCATCTATTCGAGAACTGTA  
AGTTTTAACATTATTTCAATTTGAACATTTCCATTTTTCAGTGAGATTGATAATTCTGCTCAT  
TTGGAGCACATCGATGGATCTTCTCTCTCCGTTCTCTCAAACCTTCGAAAGCTTCTGTAGTTA  
AATGTCCAATCTTCGTGAAATTTCTGGAAAACTTTTGGTCAACAACACGAGAATTCAGAATGT  
GTAAGGTTTTATTATTAATAAATCATTCTAATGTAAGTCCTTTTTTAGAATACTAAAAAACAA  
TGGACTCGCTACAATGCCTTTCGTTGAGAATGACTGATGCTCATCACGTGCTCCTTGATAGAATT  
GATTTATCAGGAAACAAAATTAATTTATTAGTGATTCAAAGTTCGAAATGTGAAGGCAAGAA  
CTGTCGTGCTGAGTGAAAATAAGCTTATTGAAATATCAGGATATGCATTCACAGAAAGTCAGTT  
TCTGAAACTGTAAGTTTTTCTTAATTTATAAAAAAATGAAGTAAGTTCTTGTAGAAAGCTAA  
ACAACAATCCAGACCTCCGAAGTCTATCTGTTGATGCATTCAAAAATATGGCAGGTCTTCAAAC  
ACTGTAAGTTTTATTATATTCAAGAATGGTTAATTTATACAATTAATTACAGAGATCTTCTCA  
TACTTCTATCGATACATTGCCTATAAATGGTCTGAAGAAGTTGAAAACATTGATTCTGAATGAT  
GTTCCAACACTCAAAGTCTTCCCAGTGTTTTTGAGTTTTACTGATTTAGAACTGCTCATTTCA  
CTTACCCACACCATTGTTGCCTTTTCAAAGTAAGTTTAGATATTATGGTACTTGTAATATCACA  
ATTGCTCAGTACGTGGATGATGTTACAATGAATGATAATGGAAAGTATCAAAGAAATGCAAAG  
AAATTCACAAACGAATTTGTGACAAAAGAGAACAACAAAAGTCGCAAGGAGAAGAAAACGGGA  
AACTAGCGGAATTGATTTTTTGGATATGTTATTGAAAGAATGGACTGATAATAGCACATACACG  
GGACCAGATGATGCTGATGATGATGAGTTGCCACGTAAGTAAATGTAACCTATTTTCTGATCTA  
CTCGTTCTAAATATTGTTTGGTAACGTTCTTTTTGTTGAGTAGACTTCCACGGTAAAGGCAAG  
GGTAGAGGGTGAACGAACCTCCGCCTCGTCCGGCAAAGTTTTAATTTGAGCACGGACAAAAGTT  
TATGGAGAACCATTGGACAAACAATAAAAGTATAACTTTCAGCATTTGTTGAAATTGGAGCGGA  
ACCTTGTCATCCATTGGGGAGGAAGTTCAAAGTACTATTCTAACATTACTTGTTATCCACAA  
CCGGATGCTTTGAATCCATGCGAGAATATTGTTGGATATCCATTCCTTCGAATAGCAGTTTGGG  
TTGTTTTGCTTTGCAGCAATAGTAGGAAACATTATTGTTTGGGCTTTGTTAGGAATAGTTTACGA  
GAAACGAATGAGGATGCATTATCTTTACATGATCAATATGTCTGTAGCTGATATGGTCACTGGT  
ATGTTATTAAGCTCTGTAACATAATTAAGAAAAGTTTCAGGAATTTACCTTGCTGTTCTTGC  
AATTGCTGATGCTAAAATGTCTGATGAGTATTATAGACATGCTGTTTGGTGGCAGACAGGATGG  
GGATGTCGAGCTGCTGGATTTTTGGCGTTTTTGCATCTGAACTAGGAATCATTTCAATGTTTT  
TAATTGCATTCGAAATGTCATATAACACAAGGTTAGTATTTGTCGTTTCTGATAATAATTTTCA  
GTTAAAATTCGAAAAGATTACTATTATTTCAAGATTTTCAGACAATCATTTTCGTGGGCGCGTTT  
GAGTCCAAAAGTTGGAGTACTTCTTATGATTGGTGGATGGCTTTTTGCGATTATAATGGCAATA  
CTTCTTGGTTTTGATGTTTCTTCATACTCTGAGAGTAGCGTATGTCTTCTTGGAGAGCAGCAA

CAATATTTGATAAAAAGTTATTTGATATTCGGACTCAGTTTCAATTTTTTTGGCATTGCGGCAAT  
GGCTCTTTCGTACGGATTTATTGTGAAAATGTTGAAGGTTTTAAATTATCTGAAAGTTATAAAC  
AAACAAATCACATTTTCAGGAAAACGAAACTCGCGAAGAAGACCGTGCACTTATAACTAAAATGA  
CAGTTCTAGTTGTAAGTACTGATTTGATTTGCTGGTTTTCCAACCTGTTCTTTGGATTTACGGCCAC  
AATTGGATTTCCACTGCTTTCTTTGTTCATCTGCCAAGTTTGTCTTGTATTCTTCTTTCCAATC  
AATGCCTTTGCCAACCATTCTTTACGTTTTCTTCACTGAAGTCATCCAACATCGAGTTCGAA  
GCAAAACATTACCAGTTATCAGAAGGATCACTACTGGGCCTTTGAATGCTGCCAGCTCTCTATC  
AACTTCTATCATTTCTCAACCACCTGGAGCACATCGAAGAAGCAGAGATGAACCAACAAGTCCA  
TCTGGAATGCATTTGGCAGTTACCCAGGTACGCCAGGTATATAACGAAAGTCTACAGAAAATTG  
AAGTGTGTTAAACAATTCAAAAATTTTAGACAACATCACTAACAGTACACCAAGGGGATCAG  
ATGTTTTCCCGTGCTTCTGATGGAATGCTTTTTGATTATGATCGAAGAGCCAGTGCATCTCCGAG  
AGTTTCGTTTGATATTCCAATTTCTCCAACAACCTCCAAGATCTGATAGAAAAGAATAGGATATCT  
CTTCTCAAGAGAATAGTTTTCCTCAATACCAGAAGTATCCGATCTTTCCGAACATTC AAGTGAAA  
GCCATCATGAGCATGTACCTCATCCTAGAAGAAAATTGAGATCATCATTTGAATAGAATCCTTGC  
ACTTGGAAGAAGGCAAGAAGGCTCAGCAGATTCGGAAGAGGATCCATTGCATCTTCTGCTGGC  
TCTGTAAGTACATTTATCTGAATTAACGAAATTTACCCGTTGCGTTTTTCGCCGCGAATTTTTTG  
TATTTCTGAAAATATGTTTTTTTTTTGTA AAAATGCAGTTAATCTTTTTCAATAATTTAGGGTAT  
AACAAAGAATACTTGAAAATTA AAAAATTTTCAGCGTGATCAAAAATGAAAGAGTATCCTTAAC  
CAGCAACGCTTCTTCAATATTGAGTCCACTTTTATCTCCGACAAATTCAAACATTTTAATACTA  
CCTCCCGAACCATCAAAAATCGTCGAAAGTCCACTCCAGCCATAACCACTTCTCGTAGTTTCTG  
ATTGTTCTTAGATTTCTTCAAAAAGTTTCTAAAATTTGTATAATAATGTATCCTAGTTTCATATTT  
TCTTTAATAATTTATTTGTTTCTTTTCATTCACATTTCTTGATTGCGGGTCAATGAATACGAGC  
CTCCACACAAATGCCCTTCGTCTCTCTAATTTTTTCAAATCATTGTTTCGTTTGCCCCGTGAGA  
ATTGTTTATTCTTCATGATTAATAAAAATAGTTTGATTCTGA

**Sequence of *fshr-1(ok778)*:**

GTCGCTGCTAATCAAATGACATGCTCAACATATCGATCGATTCAACTTTTTTCAAATCTACTCA  
TTTTTATTCTAATTATACTGTACCTACAAACAATAGAATGCCAGAATGCATTGAGTCTTGCCCA  
GACAAAACATTCATGTATGGCTTTAAAAGCCGAGGATGGAGAAGGATGTACATGCAAACAAACA  
AAACGATATGGACAACCTGAGTGTGTTGTATGGGATTGATTGTGTCTCAATTGCCAACTAACT  
TGACTGCTGACGTTGGATATTTGTGAGTTGTTTCAAGGTTAAGTTCGGGAGAAAATTTTTGGATG  
GAACATGTATTTAATCCTTGCAACAAAATTTGGATTTAATTTCCAATTATAGTAACTGATTTGA  
TTTGCTGGTTTTCCAACCTGTTCTTTGGATTTACGGCCACAATGGATTTCCACTGCTTTCTTT  
GTCATCTGCCAAGTTTGTCTTGTATTCTTCTTTCCAATCAATGCCTTTGCCAACCATTCTT  
TACGTTTTTCTTCACTGAAGTCATCCAACATCGAGTTCGAAGCAAACATTACCAGTTATCAGAA  
GGATCACTACTGGGCCTTTGAATGCTGCCAGCTCTCTATCAAACCTTCTATCATTTCTCAACCACC  
TGGAGCACATCGAAGAAGCAGAGATGAACCAACAAGTCCATCTGGAATGCATTTGGCAGTTACC  
CAGGTACGCCAGGTATATAACGAAAGTCTACAGAAAATTTGAAGTGTGTTAAACAATTCAAAA  
TTTTAGACAACATCACTAAACAGTACACCAAGGGGATCAGATGTTTCCCGTGCTTCTGATGGAA  
TGCTTTTTGATTATGATCGAAGAGCCAGTGCATCTCCGAGAGTTTCGTTTGATATTCCAATTT  
TCCAACAACCTCAAGATCTGATAGAAAAGAATAGGATATCTTCTCAAGAGAATAGTTTCTCTCA  
ATACCAGAAGTATCCGATCTTTCCGAACATTC AAGTGAAAGCCATCATGAGCATGTACCTCATC  
CTAGAAGAAAATTTGAGATCATCATTTGAATAGAATCCTTGCACTTGGAAGAAGGCAAGAAGGCTC  
AGCAGATTCTGGAAGAGGATCCATTGCATCTTCTGCTGGCTCTGTAAGTACATTTATCTGAATT  
AACGAAAATTTACCCGTTGCGTTTTTCGCCGCGAATTTTTTTGTATTTCTGAAAATTTATGTTTTTT  
TTGTAAAATGCAGTTAATCTTTTTCAATAATTTAGGGTATAACAAAGAATACTTGAAAATTTAA  
AAAATTTTCAGCGTGATCAAAAATGAAAGAGTATCCTTAACCAGCAACGCTTCTTCAATATTGAG

TCCACTTTTATCTCCGACAAATTCAAACATTTTAATACTACCTCCCGAACCATCAAAAAATCGT  
CGAAAGTCCACTCCAGCCATACTACTTCTCGTAGTTTCTGATTGTTCTTAGATTCTTCAAAAAG  
TTTCTAAAATTGTATAATAATGTATCCTAGTTTCATATTTTCTTTAATAATTTATTTGTTTCTT  
TTCATTACATTTCTTGATTGCGGGTCAATGAATACGAGCCTCCACACAAATGCCTTCGTCTCT  
CTAATTTTTTCAAATCATTTGTTTCGTTTGCCCCGTGAGAATTGTTTATTCTTCATGATTAATA  
AAAATAGTTTGATTCTGA

**Sequence of *mlh-1* gene:**

TTAGACTACTCAACATTGCTCTCCGAACACTAAAAAGTGCCCTTTTTTCAGAATAAAGCGGTTT  
TATACATTTTCAAAAAAATTATTTTTTTGCCCCAAAAAAAAGGACAGTCATTAGATGGCTGAAA  
AATGAAAATGGGCAAAAATAAAAAGTTGCCTAAATTTGTTGAAAACGGGTAATTCATATATGGA  
GAATTCAGAAAATCTAGGTTTCGCCCCGTCAAAAACCATTAGAAAAGTGGCAAAAATGGACAATTT  
ATGGCAAAAAGTCACAATTTTGAAACTATTCTAAAATGGGCATTTTTTTTAGTGTTTCGGAGAGCA  
ATTTTGAGTCCCTCTAACTACAAAATTGCCATTTTAGGATAGTTTCAAATTTGTGACTTTTTTG  
CATAAATTGTCCATTTTTGCCACTTTCTAATGGTTTTTCGACGGGTGAAACCTAGATTTTCTGAA  
TTCTCCATATATGAATTACCCGTTATCAACAAATTTAGGCAACTTTTTATTTTTGCCATTTTC  
ATTTTTTCAGCCATGACTGTCTTTTTTTTTGGGCAAAAAATAATTTTTCTGAAAATGCTCGAAAC  
CATTATATTTCTAAAAAAGGCATTTTTTTAGTGCTGGAAATTAATTTTGAGTCTTCTAGCCACA  
AAATTAACCATTTTATGGACGTTTCGAAACTTTGGAATTTTAATAAATTTAGCCAATTTTGCCA  
CTGCTTGTA AACGTTCCAACTTCTGT CAGAATGACCGAATTTTATTCAATTTTCAACAAAGT  
AGTATAAATTATGTTCCACATCGCTCGAAGACTTTGTACAAATCATGAGAATCAGCCAATTGTC  
GAATGACTCCAGCTTGCTTGAAATGCTCAGGCGGAATGAATTTCCGTTTGACAAGAGGCATGAG  
GACCTCCTTAATCAGTGTTTTCCAGGGAGTTGCCGAAAACGCCGATATTTTCTTATCGAGTGTG  
ATGAAGTTGGTGTGAGTGTGAAGAGATCGCCGATGGCACGGCAAATTTGTGCGGAATGTGTTTT  
GTTCTTGAAAAAATAACCTAGAAACCGATTTCAACGGGTACCATGTCAAAGTCAGTGGCTTAA  
AACTAGAATTTTCAATTTTTTAGTCTGTCTGTTTTTCATGACCTAGCAATATAGGATCCAAGCC  
GCAGACTAAATAGTAGACTTTTTATTA AAAACAGTGGCCTAGAAATGCGGAAATATAACTTTTTAG  
GCCACGACTCGAGCTTTCCAGACTATTGTAAGCCTAGAAGCCCAATTTTCAGATTTATTAGGCCAA  
CAACGCAAGGCTTTCTGAGCTGAGAATTTCTTTATCATCCGGATGACCTAGAAGCCCAAGCTTCA  
CATTTTTCAGGCCAACAAATCGGTA ACTGGTGGCTTAGAATCCCAAATTAGTCCGCCATTCTCAC  
TAAATCTCGAGGTTTTTTTCGCAACACTTACATCATATAATCCACGTTCAAACGAGTGTGCGA  
ATTAGAAATGGTAGCTTTTCAAGCTGTGGCACAAAATAATGCACCAGTGATGGAATCTCAGTGA  
TATGAAGCCTCCCATTTCTCCAGCTGATCTAACTTTATGGCAAAAATAGTCGTGAAGCAGGTCAGC  
GTGCTCGGCGAGCAACTTCTCCGCCGCAAATCGATTTTCCACGTTTGCAAAAACCTTCGAAAGCC  
GCGTAATTTGGCTCACGAGTGCTCAGCTCTCCAAGAAGTTCAAGAATTTTCGATGATTGCCGGCG  
GCTCCTCGTTCGAGTCGATAGGATCCGTAATTTGCCGAACGAGAAAACGGAAATCTGGTAGAAAA  
CTCTCGGAGCACGGTGGAAAAGTCGAGATGGTAGAGGGAGGTGCCGAATTTGGATGAGCACTTGT  
TTCACGTTGATTGAGCCGACAAATGTGCTCGTTTTTGAACATTTTCACGGAGCGATTGTGATGAGT  
TGGCAATGATTTCTTGC GAAGAACTTCGATTGATTCAAAGTGAAATTCGCGGTGGGTTTTCTG  
AAAAAATTGATTTTCTTAGTTACGGATTTTGA AATAGGCCAGTAGTTTCTATATAACAGGCTA  
TCGTATTAAATTCGGTTTTTAAATTTTGGGATTTCTAGGCCACCAGTTATTAATAAATCGCCTAG  
AATTTAGAAATTA AAAATTTCTAGGCCACCGTGATGAGTTTGGTGGGTAGGCCACCAGTCACCTC  
AAAATTGAAAAGTGTGGTTTTCAAGCCATAAGCTATTGGCCTTAGACAATTGCTGTAATGGCCT  
GGAAAAGCTGTTAACC CATCATGTAAACTTTGAATTTTCTAGGCCACCCGTTTCGACAGATCGG  
CCTAAAAATCTAGCTCTAGGATTTCCAGGCCACCGATTTTCGAGTCATTGGCTCTGGTCCACTAGG  
CCACTAGTCGAAATTTGCAAAATCGAATTTTCTAGGCCATTGCTTCCAATGTGTTAGCCTAGGAA

TCAGGATTTAGGGCGTCAAGGTCTCCAAATTTGCAGACCTAAAAATCTCAAGTGTACTAACC  
CGTACTCAAAATCCACATCATCGTCTTCTCCCAAATCCTGTGACTCATTGAGCCGACGACCGTC  
GGCTGTGCTAACCAGCGATACCATTGACACGTCATCAAAATCGGTATTGAGGTCCTCCGGCTCC  
TTCTCCCCACCAGTAGAATCTTCTGTTCTCGCTCGCTTCAAAATTCACACTACCTCCGAAGATAT  
CGTCGTTGCTCGTGGTGGGACCAACCGCGCCGCGGAGTTACGAATTCGTCAATTTTCCGTTT  
TTTGGCATCTGTTCCGACTTCCATGTAGTCGACGCGTTTTTTATCGGATTTCCACGCAGACGGA  
CTCGATTTGAATCTGAAAAATTAACCTATTAGAAATAAAAACTTAAATTTCTAATCCAAAACCT  
TGTAACAAATAGCCTAGAAACTTGTTCAGATTTATAGGGTCACATCATAACTTTTGGCTTG  
CTTTCTAGGCCTTAATCGAAAAAAAAGTGACCTAGAACTCGAATTTTATTTTCTAGGCCAC  
CCCGCAGTTACGTATGGCCTAGAAAGCCGAACCTTCCAAAATATCTACCTGGCTTTGTGTGCG  
GTTTCCTGATCGCTTCAATAGATTTCAAGTATTGGCTCATTGGGATCATCACCAGATTTTCGAT  
GTCCGGCTGTTCCCTCCTCAGGCTTCTCAACATCTAGGGCCTCGAATCCGAAAAATCTCGCCAATA  
ACTTTCTCGAAATACGCGGAATTTCTCGATGATCTCCTCCTTTTCCAAGAAAATCACCGAAT  
TTTTTGTGCGATGCACGTTACATCGATTCGCGTCTCGTCGATTTGCAGGTGAAGAGCACAGAA  
TTGCGCGTGCAGTTGTGCGAGCTCCGAGAACTTCGTGATCGGGTGTGAGAAATGTGCGCAGCGA  
ACACTTCGTCCGTTGATGAACACACTGAAGAAGAACGGCTCGTTTTCCGGTTTTGTGCGATTG  
CCGCCGTTGCCGAGGCGATTGGCTTGGAGATGTGACCGGTAAGGTGAATTTGAGACGAGTGGA  
GTTTAGAGATAATGGAAGGATAGTCTGAAAATTGAATCCTTTAAATCTACATGTTTGGGTTTCT  
AGGCCATCTTCTCAGTTGGAGTGGCGCAGAAATTTAACTTTTGGGTTTCTAGGCTATCGGCTC  
TAATGTGTTGCGCTAGAAACCCTAGAACTCTTAACACTGTGCTTAGAAGCTCAAAAATATGA  
TTTTCTAGGCCTTGATGAATCTTAACCTTTAGGTTTTCTATCACGGTAGCACAGAACTAGATGG  
GTTGGTTCATGATACTCAGTCTGAAACCTATTTTGGCTACTATCTCGAAAACCATCACAAAAT  
CGATTTTTCGATGCATATAGGAAATGACCGCAATGAAATTATCTATCTTTATTTGTGATGAATT  
TTTGATTTTATACTTCTGGCCAAGTTATGCACGTTTGTTCGGTGGAGCTCGTTTGCACCCATC  
TAGCAACTGAACCACCGTGATCTAGATCGTCCCTCGTTTTTTTTGCGCTCCGTTGTGGAATGTCGT  
AAATTGTTGGGTATTGGGTTACGGTAGTCTGCGCTTGCGTAATTTACAGACTACAGCATCTCTT  
AATTTTGAATTTTCGAGTTCGGAAGAATGACTAGGGAGTAAAGCTGGCAGTACTTGGAAAATTC  
TCTCTCAAATTTTTTCACTTCTGATGCCTGAAAATTGCGCAAAAACGAACTACAGCACCCCAAAA  
CCCACGATTTTACGAATTTTAATTGAAAAGCGCTAATGGGGGCAAAAATACGAGGATATCGA  
TTTTAGCATATAATTTTTTTCGAAAAAAATCGACTAATCTCCCTACATCAGCAACATCTCTGCC  
AAGTAGATTGCACACTACATCTCGAAAATTTCCATCTCCTTTCGTTTCGAAAATCGCCAGCTTGG  
TTTTGACGCAGGGCAAAGGAGACGTCACTGAAATATATTTTCATGAAAATAGATTTTTTTGAAATT  
AAAACTTTCGTGAAAACCTTTGCTTTTCAAGGACTTTAGAAAATTTTAAGACTTTTTAAGAAA  
TGTTAAGACAATGCCGAGTTTTTCAATTTTTTCGAAATATTATCTTACGGGCGATGAATTGCGAA  
TCGGAGCAACGTGTGCTTGACCATTTTCGCCTCTTCCCATGAGTTGTCATTTTGTTCGACGC  
GTCGGAAGATTGTAGAATAGATCGGTGGCGGTAATGCAGGTTCCGTTCTTACGGGCAGCTGGTT  
TCGTGTCTGCGGTCATTTTTCCGTCGAAAAATTAAGATTATCGATTTTTTCGTTTCGAAAATCT  
ATATATTTTTCAAGAAAAATCGATAAAACTATCATTGAAAATCCTTCGCAGTTGTGGCAATGTG  
TTTCTTTTTAATAAAAAATTAATAGTTGGTTTTAAAAAATTCGATTTGAATATTTTTTCGGTTTA  
CAACCAATTTTCGAGACGTTTTTAAGTTTTTATCGATTTTCGCTCAAAAATCGATGGTTTTCTT  
TAAAAAATCGATAAAACTATTTGCGATTTTTGAAAATAAACATCAATTTTTCTGGTGAAAAAG  
ATTTGATTTTTTTTTTCGGTTTTTAATAAATTTTCGAGACGTTTAAAGTTTTTATAGACTTTTTTA  
ATTTTATCGATTTTAGCTTGAAAATCAATATTTGTCTAGAAAAATCAATAAGCTGGAAGCATAT  
TGAACACAAAATTTGAAAAATCGGAACTATCGATTTAATTTTTTTTTTCGGATTTCAATGTTTT  
TAAAGCGTTTACAATTATCCAATATTCGACTTTTTGATTTTATAGATTTTTTTTTGGATAAATTT  
TTGAAAATATTTTTCAATCGATTATTTGAAAACAATAACAATTTTTCTGGTTTGTAAATTTTTT  
TCTAGAAAATTTTTCAAGTTTTTTTTTAAAGTTTTTATCGATTTTTTTTTGACGAATATCATAGAATT  
CTATTAATTTTTTACCTAAAAAATGGCCTGATACGCGCATTTTGCATCTGCTCGTTTTCGAAACG

ATATTGACTTTTGGCCACGTGGCTGAGCGATGCAAGAGCTTCTCCTCTGAATCCATATGTCTTCA  
TATGCATTAATCTTCAAATTTCTGAAGTTTTGACGTGGCAAATCGTTCACAAACCAATGCGAA  
ATCTTCCCGTTTCGATGCCTTTTTCCATTATCGGAAACCTGCAAATGGAAATTTTTTTGAAATTT  
GAGATTTTTTCGGGATTAATAAAAAAATGTTCAAAAAAGAAAATCACTAAAATTACAACCTAAGTAG  
AATTTCTCAAAAATATTTTTCCAAAGAAAAAATGTTTTTTTTTTCAAATTTTTCAAGCACCTG  
TAGAAGCTTCAATCCGCCGTTCTGCATATTAACCATAATTTTCGGTGGCGCCGGCGTCCAGTGAG  
TTCTCAACGAGCTCTTAATGGCATTACACGGCCGGGCTAGTACCTCACCGGCCGCCATTCGAT  
TAACAACATCCTGCGGTAGGCGTTGGATTAGTCCCATTAGTGAAAATTCTGAAAATATGAAAGT  
TTTCAGGAAAAGTGAAATATATCGATTTTTCTTGATATTTTAGAGATATCCGAATGAAACTAAAA  
AAAAAGAATTCTTGCCGCAAATGGACATAGATCAGTGAGGAGACCCTTAAACTCAAGCTTGA  
CAGCGAAAATCCAGAAGATCACCGATTTTTGAAAATTCATCACAATTGCGGGTACGGTAACCGC  
AATGCCACATGTCTGGCTGGCGGAAATTCAAATGTTCCACTACGATTTCCAATTTTCGGAGCTAA  
TTTTATCTTTGAACAATTTTTTAAAAATAAATTCAAATTCCCCTAAAAAAGCTTCCGATATCACAA  
AAAATAAAATTTTCCAAATTTCTCACGCACATAGTTTTACAATTTCTCTACTGTTTATTTTCATCG  
AAACACAGTGTAAAGGCGGGGCGGGGAGCGGGCGATTGAGAGGGGGGACGAGGCGGGGCAGAAA  
ATATGGATGTTAAAACACATCGACCGAGAGAGAAAGTGGACACACAAAAATACAAAAGAATAAA  
TTCGACTAGGCGATGGGAGCACAAAAAATTCAGGGGGAGGTGGTAAGTTCGTGGGGGCGGGCGA  
GCGGGCGCAATTTTCTAGAAAACAAAAATCACGAAATTTGGAGACTATACAATAGTAATAATAC  
TCATAATAATAATCATAAAAAATGATGAATAAAGCATGAGACAAATAAAAAGCGAGAGAGGGAG  
AGGTGGTGTGATTGGTGTGATGGGGCGAAAAATCAAACATTTCAATAGAAAAACATTTTTTAC  
AGAACCGTGAGAAAATTGTGTTTCAATGTACTACTTACTGACTGAAAATAATATGAAATGGTCCAG  
TAGCGCTATTTGTCCCATTCCGCCTCATCGACACCCTCCATTTGATCTTGTTCGAGGCGCGTG  
TCCACGTGATTTTTGTGTCGACCACGCAGCGCCACCTGAAAAAATTTGGTAATTTTTTAAAAATAA  
TTTTTGTTCATTTTTTATGGAGTTCTTAAAGAGCGCCGACAAGATTTTCGATTGACAAGTCAT  
AGATTTTACTCTAATTTACAATTTTAATCGAAAATTTCTCG

**Sequence of *mlh-1(gk516)*:**

TTAGACTACTCAACATTGCTCTCCGAACACTAAAAAAGTGCCCTTTTTTTCAGAATAAAGCGGTTT  
TATACATTTTTCAAAAAAATTATTTTTTTGCCCCAAAAAAAAGGACAGTCATTAGATGGCTGAAA  
AATGAAAATGGGCAAAAAATAAAAAGTTGCCTAAATTTGTTGAAAACGGGTAATTCATATATGGA  
GAATTCAGAAAATCTAGGTTTCGCCCGTCAAAAACCATTAGAAAAGTGGCAAAAATGGACAATTT  
ATGGCAAAAAGTCACAATTTTGAAACTATTCTAAAATGGGCATTTTTTTTAGTGTTTCGGAGAGCA  
ATTTTGAGTCCCTCTAACTACAAAATTTGCCATTTTAGGATAGTTTCAAATTTGTGACTTTTTTGC  
CATAAATTGTCCATTTTTGCCACTTTCTAATGGTTTTTCGACGGGTGAAACCTAGATTTTCTGAA  
TTCTCCATATATGAATTACCCGTTATCAACAAATTTAGGCAACTTTTTATTTTTGCCCATTTTC  
ATTTTTTCAGCCATGACTGTCTTTTTTTTTGGGCAAAAAATAATTTTTCTGAAAATGCTCGAAAC  
CATTATATTTCTAAAAAAGGCATTTTTTTAGTGTCTGGAAATTAATTTTGAGTCTTCTAGCCACA  
AAATTAACCATTTTATGGACGTTTCGAAACTTTGGAATTTTAATAAATTTAGCCAATTTTGGCA  
CTGCTTGTAACGTTCCAACTTCTGTGAGAATGACCGAATTTTATTCAATTTTCAACAAAGT  
AGTATAAATTATGTTCCACATCGCTCGAAGACTTTGTACAAATCATGAGAATCAGCCAATTTGTC  
GAATGACTCCAGCTTGCTTGAAATGCTCAGGCGGAATGAATTTCCGTTTGACAAGAGGCATGAG  
GACCTCCTTAATCAGTGTTTTCCAGGGAGTTGCCGAAAACGCCGATATTTTCTTATCGAGTGTG  
ATGAAGTTGGTGTGAGTGTGAAGAGATCGCCGATGGCACGGCAAATTTGTGCGGAATGTGTTTT  
GTTCTTGAAAAAATAACCTAGAAACCGATTTCAACGGGTACCATGTCAAAGTCAGTGGCTTAA  
AACTAGAATTTTCAATTTTTTAGTCTGTCTTTTTTTCATGACCTAGCAATATAGGATCCAAGCC  
GCAGACTAAATAGTAGACTTTTTATTAATAAACAGTGGCCTAGAAATGCGGAAATATAACTTTTTAG

GCCACGACTCGAGCTTTCCAGACTATTGTAAGCCTAGAAGCCCAATTTTCAGATTATTAGGCCAA  
CAACGCAAGGCTTTCTGAGCTGAGAATTCCTTTATCATCCGGATGACCTAGAAGCCCAAGCTTCA  
CATTTTCAGGCCAACAATCGGTAACCTGGTGGCTTAGAATCCCAAATTAGTCCGCCATTCTCAC  
TAAATCTCGAGGTTTTTTTCGCAACACTTACATCATCATAATCCACGTTCAAACGAGTGTGCA  
ATTAGAAATGGTAGCTTTTCAAGCTGTGGCACAAAATAATGCACCAGTGATGGAATCTCAGTGA  
TATGAAGCCTCCATTCTCCAGCTGATCTAACTTTATGGCAAAATAGTCGTGAAGCAGGTCAGC  
GTGCTCGGCGAGCAACTTCTCCGCCGCAAATCGATTTTCCACGTTTGCAAAAACCTCGAAAGCC  
GCGTAATTTGGCTCACGAGTGCTCAGCTCTCCAAGAAGTTCAAGAATTTTCGATGATTGCCGGCG  
GCTCCTCGTCGAGTCGATAGGATCCGTAATTGCCGAACGAGAAAACGGAATCTGGTAGAAAA  
CTCTCGGAGCACGGTGGAAAAGTCGAGATGGTAGAGGGAGGTGCCGAATTGGATGAGCACTTGT  
TTCACGTTGATTGAGCCGACAAATGTGCTCGTTTTGAACATTTACCGGAGCGATTGTGATGAGT  
TGGCAATGATTTCTTGGCAAGAACTTCGATTGATTCAAAGTGAAATTCGCGGTGGGTTTTCTG  
AAAAAATGATTTTCTTAGTTACGGATTTTGAAATAGGCCAGTAGTTTCTATATAACAGGCTA  
TCGTATTAAATTCGGTTTTTAAATTTTGGGATTCTAGGCCACCAGTTATTAAATAATCGCCTAG  
AATTTAGAAATTAATAATCTAGGCCACCGTGATGAGTTTGGTGGGTAGGCCACCAGTCACCTC  
AAAATTGAAAAGTGTGGTTTTCAAGCCATAAGCTATTGGCCTTAGACAATTGCTGTAATGGCCT  
GGAAAAGCTGTTAACCCTCATGTAAACTTTGAATTTTCTAGGCCACCCGTTTCGACAGATCGG  
CCTAAAATCTAGCTCTAGGATTCAGGCCACCGATTTTCGAGTCATTGGCTCTGGTCCACTAGG  
CCACTAGTCGAAATTGCAAATCGAATTTTCTAGGCCATTGCTTCCAATGTGTTAGCCTAGGAA  
TCAGGATTTAGGGCGTCAAGGTCTCCAAATTTGCAGACCTAAAAATCTCAAGTGTACTAACC  
CGTACTCAAATCCACATCATCGTCTTCTCCCAAATCCTGTGACTCATTGAGCCGACGACCGTC  
GGCTGTGCTAACCAGCGATACCATTGACACGTCATCAAATCGGTATTTCAGGTCCTCCGGCTCC  
TTCTCCCCACCAGTAGAATCTTCTGTTCTCGCTCGCTTCAAATTCCACTACCTCCGAAGATAT  
CGTCGTTGCTCGTGGTGGGACCAACCGCGCCGCGGAGTTACGAATTCGTCAATTTTCCGTTT  
TTTGGCATCTGTTCCGACTTCCATGTAGTCGACGCGTTTTTTATCGGATTTCCACGCAGACGGA  
CTCGATTTGAATCTGAAAAATTAACTATTAGAAATAAAAACTTAAATTTCTAATCCAAAACCT  
TGTAACAAATAGCCTAGAAACTTGTTTTCCAGATTTATAGGGTCACATCATAACTTTTGGCTTG  
CTTTCTAGGCCTTAATCGAAAAAAAAGTGACCTAGAACTCGAATTTTATTTTTCTAGGCCAC  
CCCGCAGTTACGTATGGCCTAGAAAGCCGAACCTTCCAAAATATCTACCTGGCTTTGTGTGCG  
GTTTCTGATCGCTTCAATAGATTTTCAGTGATTGGCTCATTGGGATCATCACCAGATTTTCGAT  
GTCCGGCTGTTCTCCTCAGGCTTCTCAACATCTAGGGCCTCGAATCCGAAAATCTCGCCAATA  
ACTTTCTCGAAATACGCGCGAATTTCTCGATGATCTCCTCCTTTTCCAAGAAAATCACCGAAT  
TTTTTGTGCGATGCAGTTCACATCGATTTCGCGTCTCGTCGATTTGCAGGTGAAGAGCACAGAA  
TTGCGCGTGCAGTTGTGCGAGCTCCGAGAACTTCGTCGATCGGGTGTGTTGAGAATGTGCGCAGCGA  
ACACTTCGTCCGTTGATGAACACACTGAAGAAGGAACGGCTCGTTTTTCCGGTTTTGTGCGATTG  
CCGCCGTTGCCGAGGCGATTGGCTTGGAGATGTGACCGGTAAAGGTGAATTTGAGACGAGTGGA  
GTTTAGAGATAATGGAAGGATAGTCTGAAAATTGAATCCTTTAAATCTACATGTTTGGGTTTCT  
AGGCCATCTTCTCAGTTGGAGTGGCGCAGAAATTTTAACTTTTGGGTTTCTAGGCTATCGGCTC  
TAATGTGTTGCGCTAGAAACCCTAGAACTCTTAACACTGTGCTTAGAAGCTCAAATAATATGA  
TTTTCTAGGCCTTGATGAATCTTAACTTTAGGTTTTCTATCACGGTAGCACAGAACTAGATGG  
GTTGGTTCATGATACTCAGTCTGGAAACCTATTTTGGCTACTATCTCGAAAACCATCACAAAAT  
CGATTTTTCGATGCATATAGGAAATGACCGCAATGAAATTATCTATCTTTATTTGTGATGAATT  
TTTGATTTTATACTTCTGGCCAAGTTATGCACGTTTGTTCGGTGGAGCTCGTTTGCACCCATC  
TAGCAACTGAACCACCGTGATCTAGATCGTCTCGTTTTTTTTGCGCTCCGTTGTGGAATGTGCT  
AAATTGTTGGGTATTGGGTTACGGTAGTCTGCGCTTGCGTAATTTACAGACTACAGCATCTCTT  
AATTTTGAATTTTCGAGTTCGGAAGAATGACTAGGGAGTAAAGCTGGCAGTACTTGGAAAATTC  
TCTCTCAAATTTTTTCAATCTGATGCCTGAAAATTGCGCAAAAACGAACTACAGCACCCCAAAA  
CCCACGATTTTACGAATTTTAAATTGAAAAGCGCTAATGGGGGCAAAAATACGAGGATATCGA

TTTTAGCATATAATTTTTTTCGCGAAAAAATCGACTAATCTCCCTACATCAGCAACATCTCTGCC  
AAGTAGATTGCACACTACATCTCGAAAAATTTCCATCTCCTTTTCGTTTCGAAAAATCGCCAGCTTGG  
TTTTGACGCAGGGCAAAGGAGACGTCACTGAAATATATTTTCATGAAAAATAGATTTTTTTGAAATT  
AAAAACTTTCGTGAAAAACTTTGCTTTTCAAGGACTTTAGAAAATTTTAAGACTTTTAAAGAAA  
TGTTAAGACAATGCCGAGTTTTTCAATTTTTTCGAAATATTATCTTACGGGCGATGAATTGCGAA  
TCGGAGCAACGTGTCGTTGACCATTTTCGCCTCTTCCCATGAGTTGTCATTTTGTTCGACGC  
GTCGGAAGATTGTAGAATAGATCGGTGGCGGTAATGCAGGTTCCGTTCTTACCGGCAGCTGGTT  
TCGTGTCTGCGGTCATTTTTTCCGTCTGAAAAATTAAGATTATCGATTTTTTCGTTTCGAAAAATCT  
ATATATTTTTTCAAGAAAAATCGATAAAACTATCATTGAAAATTCCTTCGCAGTTGTGGCAATGTG  
TTTCTTTTTTAATAAAAAATTAATAGTTGGTTTTAAAAAATTCGATTTGAATATTTTTTTCGGTTTA  
CAACCAATTTTCGAGACGTTTTTAAGTTTTTATCGATTTTCGCTCAAAAATCGATGGTTTTTCTT  
TAAAAAATCGATAAAAACTATTTGCGATTTTTTGAAAAATAACATCAATTTTTTCTGGTGAAAAAG  
ATTTGATTTTTTTTTTCGGTTTTTAAATAAATTTTCGAGACGTTTAAATACAAAAGAATAAATTCG  
ACTAGGCGATGGGAGCACAAAAAATTCAGGGGGAGGTGGTAAGTCGTGGGGGCGGGCGAGCGG  
GCGCAATTTTCTAGAAAACCAAAAATCACGAAATTTGGAGACTATACAATAGTAATAATACTCAT  
AATAATAATCATAAAAAATGATGAATAAAGCATGAGACAAATAAAAAGCGAGAGAGGGAGAGGT  
GGTGATGGATTGGTGATGGGGGCGAAAAATCAAACATTTCAATAGAAAAAACATTTTTTACAGAA  
CCGTGAGAAAATTGTGTTTCATTGTACACTACTTGACTGAAAATAATATGAAATGGTCCAGTAGC  
GCCTATTTGTCCATTCCGCCTCATCGACACCCTCCATTTGATCTTGTTCGAGGCGCGTGTCCA  
CGTCGATTTTTTGTGACCACGCAGCGGCCACCTGGAAAAAATTTGGTAATTTTTTAAATAAATTTT  
TGTTTTCAATTTTTTATGGAGTTCTTAAAGAGCGCCGACAAGATTTTCGATTGACAAGTCATAGAT  
TTTACTCTAATTTACAATTTTAATCGAAAAATCTCG
