# Supplementary material for: Studying Human Disease Genes inCaenorhabditis elegans: A Molecular Genetics Laboratory Project
Source: Atypon-hosted journal article supplement (doi:10.1187/cbe-11-06-0045), 2012-06-01
Supplement: combinedsupmats8.pdf [file combinedsupmats8.pdf]

# Mini-Poster Guidelines

Biocore 304 Spring 2007

*What can worm's tell us about human disease genes?*

## General notes:

- Create each panel as individual slide in Powerpoint (these will need to be handed in).
- Once all your panels are done, put them all together on one Powerpoint slide (create this as a separate file) in poster format, as shown on the back page.
- The poster layout shown on the back page is just a suggestion, it can be modified as necessary to accommodate your panels, which might be different sizes than those shown.
- Try to keep text to a minimum, and use pictures whenever possible to convey information.
- Number each panel in the order it is to be read by observers.
- Include a title for each panel at the top (try to make it as succinct, but informative as possible).
- Use a non-serif font, such as Arial or Helvetica.
- When using text, make it as large as possible. General guidelines are 30-36 point font for titles on panels and 20-24 point font for other text.

## These are the items that should be included on your poster:

### Title

Keep succinct: should convey the issue, approach, and system used.

### Author Name

Include under the title.

### Abstract

This is a brief summary of the information on the poster. You should include the main goal of the work presented, an overview of the experiments performed, and a brief summary of the results and conclusions. Aim for 200 words or less.

### Background

Can either put on one panel or two separate panels.

- 1) Describe the gene that you focused on in your experiments.
  - What human disease is it associated with?
  - Why is it important to study?
  - Is *C. elegans* a good model for studying the function of this gene? Why or why not?

- 2) Briefly describe the two approaches you used to assess the knock-down phenotype of your gene.

## **Results**

Include an individual panel for each of the following:

1) **Analysis of the genetic deletion.** Show a schematic of the wild-type gene and the gene with your deletion. Include the gene structure (promoter, exons, introns, etc.) and indicate the region affected by the deletion. Describe (in pictures if possible) how the deletion is likely to affect the mRNA and protein produced by the deletion allele. Include a brief description of the experimental approach and methods used to generate your data.

2) **Description of the phenotype exhibited by the deletion mutant.** Show / describe the phenotype of wild-type worms compared to the phenotype obtained with worms carrying the deletion. Include a brief description of the experimental approach and methods used to generate your data.

3) **Description of the phenotype exhibited by wild-type worms treated with RNAi for your gene of interest.** Show / describe the results from your feeding RNAi experiment. Include your controls. Include a brief description of the experimental approach and methods used to generate your data.

## **Conclusions**

Succinctly state the conclusions from your experiments (use bullet points). How are all of your results related to each other? What can you conclude based on integrating all the data you collected?

## **Future directions**

Succinctly propose at least two experiments that you would like to perform to further characterize the function of your gene. What will these experiments tell us? Why are they important?

## **References**

List any references used on your poster.

# Title

Author

1 Abstract

3 Results  
(panel #1)

5 Results  
(panel #3)

2 Background

4 Results  
(panel #2)

6 Conclusions

7 Future  
Directions

References
