# Supplementary material for: Studying Human Disease Genes in Caenorhabditis elegans: A Molecular Genetics Laboratory Project
Source: PubMed Central journal article supplement — CBE Life Sci Educ. 2012 Summer;11(2):165–79. doi: 10.1187/cbe-11-06-0045 (PMC3366902; doi:10.1187/cbe-11-06-0045), 2012
Supplement: supp_11.2.165_CombinedSupMats2.pdf [file supp_11.2.165_CombinedSupMats2.pdf]

Supplemental Table 1: Additional *C. elegans* homologs of human disease genes that may be useful for this laboratory exercise.

| <b>Gene (allele) STRAIN</b>                | <b>Molecular function of gene product</b>                                                        | <b><i>C. elegans</i> deletion phenotype from Wormbase</b>                                                        | <b><i>C. elegans</i> feeding RNAi phenotype from Wormbase</b> | <b>Human homolog (Genbank accession number)</b> | <b>Associated human disease (OMIM number)</b>                           | <b>Special treatment conditions to visualize phenotypes</b>                                                                                                        |
|--------------------------------------------|--------------------------------------------------------------------------------------------------|------------------------------------------------------------------------------------------------------------------|---------------------------------------------------------------|-------------------------------------------------|-------------------------------------------------------------------------|--------------------------------------------------------------------------------------------------------------------------------------------------------------------|
| <i>eya-1</i><br>( <i>ok654</i> )<br>SA146  | Protein tyrosine phosphatase, Transcriptional regulation                                         | Early larval arrest, higher penetrance above/below 20°C, Uncoordinated, Dumpy, Egg-laying defective, Multivulval | Locomotion variant, Dumpy                                     | EYA1 (Q99502)                                   | Bor syndrome (600257)                                                   | Temperature affects phenotype penetrance for deletion allele.                                                                                                      |
| <i>him-6</i><br>( <i>ok412</i> )<br>VC193  | ATP-dependent DNA helicase                                                                       | Germline mortal                                                                                                  | Locomotion variant                                            | BLM (U39817)                                    | Bloom syndrome (210900)                                                 | Grow <i>him-6(ok412)</i> worms at 25°C to see germline mortal phenotype.                                                                                           |
| <i>itsn-1</i><br>( <i>ok268</i> )<br>VC201 | ATP-binding; Role at synapses                                                                    | Aldicarb hypersensitive                                                                                          | Oocyte morphology variant                                     | NCF1 (M55067)                                   | Chronic granulomatous disease (306400)                                  | For RNAi, use <i>rrf-3(pk1426)</i> worms [strain: NL2099, these are hypersensitive to RNAi]. Weaker touch response to aldicarb, see S. Rose, et al. PMID 17942601. |
| <i>ogt-1</i><br>( <i>ok430</i> )<br>RB653  | Protein N-acetylglucosaminyl transferase activity, Protein serine/threonine phosphatase activity | Drug resistant, Phermone-induced dauer formation defective                                                       | Dumpy                                                         | OGT (8473)                                      | Maps to a region associated with neurologic diseases, X-linked (300255) | Deletion requires treatment with PUGNAc or daumone, see J. Lee, et al. PMID 19940149.                                                                              |

|                                                                                         |                                                 |                                                                                         |                                                                                       |                      |                                                               |                                                                                                                                                                                             |
|-----------------------------------------------------------------------------------------|-------------------------------------------------|-----------------------------------------------------------------------------------------|---------------------------------------------------------------------------------------|----------------------|---------------------------------------------------------------|---------------------------------------------------------------------------------------------------------------------------------------------------------------------------------------------|
| <i>pdr-1</i><br>( <i>lg103</i> ),<br>no strain<br>in CGC<br>or try<br>(gk488)<br>VC1024 | E3 ubiquitin<br>protein ligase                  | Developmental<br>defects, Early larval<br>lethality (see<br>Springer, PMID<br>16204351) | Embryonic lethal                                                                      | parkin<br>(AB009973) | Parkinson disease<br>juvenile 2<br>(600116)                   | Deletion requires<br>treatment with an ER<br>stressor, see Springer et al.<br>PMID 16204351; contact<br>authors for strain or<br>VC1024 may have an ER<br>stressor phenotype<br>(untested). |
| <i>sma-1</i><br>( <i>ral8</i> )                                                         | Beta Heavy-<br>spectrin                         | Reduced body length<br>(by 44%),<br>Abnormal pharynx,<br>Small brood size               | Reduced body<br>length,<br>Slow growth,<br>Body shape<br>defects,<br>Small brood size | SPTB<br>(J05500.1)   | Hereditary<br>spherocytosis and<br>elliptocytosis<br>(182870) | None needed.                                                                                                                                                                                |
| <i>wrn-1</i><br>( <i>gk99</i> )<br>VC174                                                | ATP-dependent<br>3'-5' DNA<br>helicase activity | Hypersensitivity to<br>ionizing radiation                                               | Head and other<br>morphology defects                                                  | WRN<br>(L76937)      | Werner syndrome<br>(277700)                                   | Ionizing radiation,<br>see SJ Lee et al.<br>PMID 20062519.                                                                                                                                  |
| <i>wsp-1</i><br>( <i>gm324</i> )<br>NG324                                               | Actin regulator,<br>Interacts with<br>Arp2/3    | Embryonic lethality<br>(25%), Reduced<br>brood size                                     | Embryonic lethal,<br>Larval arrest,<br>Locomotion variant                             | WASP<br>(U12707)     | Wiskott–Aldrich<br>syndrome<br>(301000)                       | None needed.                                                                                                                                                                                |
| <i>xnp-1</i><br>( <i>tm678</i> )<br>IG256                                               | ATP-dependent<br>DNA helicase                   | Sterile at 25 <sup>0</sup> C                                                            | Gonad defects,<br>Small brood size                                                    | nibrin<br>(AF051334) | Nijmegen<br>breakage<br>syndrome<br>(251260)                  | Deletion sterile at 25 <sup>0</sup> C;<br>for RNAi see<br>AM Bender, et al.<br>PMID 15328017.                                                                                               |

## Legend for Supplemental Table 1

Some of the genes utilized in the described laboratory module have relatively mild phenotypes. Therefore, we continued to search for more genes that may be tried in the future. This table presents nine genes that could potentially be used effectively in this lab exercise, based on information in Wormbase and the literature. The genes listed here were derived from Culetto et al. (2000), which contains a table of one hundred *C. elegans* genes that are homologues of positionally cloned genes mutated in human disease. An additional thirty-eight genes from the scientific literature were also examined.

Due to the nature of the experiments performed in this laboratory exercise, only the nine genes listed in this table appear to be good candidates for use (in addition to the four in use already). Genes were eliminated from consideration based on the following issues:

- 1) the gene had no reported deletion phenotype
- 2) no deletion allele (in some cases, point mutations are available; however, point mutations are more difficult to detect by PCR, and would require revision of the current protocol.)
- 3) no *C. elegans* strains available even though a deletion allele has been described
- 4) the deletion is lethal or sterile and so cannot be maintained as a homozygote
- 5) deletion too large to easily characterize by PCR (>3000 bp)
- 6) deletion too small to easily detect by PCR (<200 bp)
- 7) no RNAi by feeding phenotype listed in Wormbase

The genes listed in this table do not have these limitations; however, most will require an additional treatment to bring out a phenotype, such as using an RNAi hypersensitive strain, or a chemical treatment. Interestingly, several of the genes that fit the selection criteria are DNA helicases (yellow rows) and could make for a DNA helicase-themed lab exercise.
